# Supplementary material for: Computational study of the Rayleigh light scattering properties of atmospheric pre-nucleation clusters
Source: Royal Society of Chemistry journal article supplement (doi:10.1039/c4cp01206b), 2014-01-01
Supplement: c4cp01206b1.pdf [file c4cp01206b1.pdf]

# Supporting Information

## Computational Study of the Rayleigh Light Scattering Properties of Atmospheric Pre-Nucleation Clusters

Jonas Elm<sup>†</sup>, Patrick Norman<sup>‡</sup>, Merete Bilde<sup>¶</sup> and Kurt V. Mikkelsen<sup>†</sup>

<sup>†</sup> *Department of Chemistry, H. C. Ørsted Institute, University of Copenhagen, DK-2100 Copenhagen Ø, Denmark*

<sup>‡</sup> *Department of Physics, Chemistry and Biology, Linköping University, SE-581 83 Linköping, Sweden*

<sup>¶</sup> *Department of Chemistry, Aarhus University, Langelandsgade 140, DK-8000 Århus C, Denmark*

E-mail: elm@chem.ku.dk

# Basis set and functional assessment of polarizabilities

Calculated polarizabilities are very dependent on diffuse functions and the choice of DFT functional. To assess the performance of different functionals and basis sets preliminary results are benchmarked against coupled cluster ccSD(t) and experimental results. All calculations were done in Gaussian09.

**Table 1:** Calculated isotropic mean polarizabilities ( $\bar{\alpha}$ ) of H<sub>2</sub>O using different DFT functionals and basis sets compared to coupled cluster and experimental data.

| Basis set     | CC2  | CCSD | CCSD(T) | CAM-B3LYP | B3LYP | M06-2X | PW91        |
|---------------|------|------|---------|-----------|-------|--------|-------------|
| cc-pvdz       | 5.12 | 5.13 | 5.15    | 5.24      | 5.29  | 5.19   | 5.40        |
| cc-pvtz       | 6.87 | 6.90 | 6.95    | 7.01      | 7.08  | 6.97   | 7.26        |
| cc-pvqz       | 7.73 | 9.32 | 7.87    | 7.93      | 8.01  | 7.89   | 8.21        |
| aug-cc-pvdz   | 8.87 | 8.99 | 9.14    | 9.27      | 9.39  | 8.85   | 9.88        |
| aug-cc-pvtz   | 9.15 | 9.26 | 9.46    | 9.62      | 9.77  | 9.20   | 10.32       |
| aug-cc-pvqz   | 9.21 | 9.32 | 9.54    | 9.75      | 9.90  | 9.42   | 10.44       |
| d-aug-cc-pvdz | 8.87 | 9.53 | 9.70    | 9.86      | 10.02 | 9.32   | 10.61       |
| d-aug-cc-pvtz | 9.31 | 9.44 | 9.65    | 9.85      | 10.01 | 9.37   | 10.65       |
| d-aug-cc-pvqz | 9.26 | 9.38 | 9.61    | 9.84      | 10.00 | 9.48   | 10.58       |
| <b>Exp</b>    |      |      |         |           |       |        | <b>9.92</b> |

**Table 2:** Calculated isotropic mean polarizabilities ( $\bar{\alpha}$ ) of NH<sub>3</sub> using different DFT functionals and basis sets compared to coupled cluster and experimental data.

| Basis set     | CC2   | CCSD  | CCSD(T) | CAM-B3LYP | B3LYP | M06-2X | PW91         |
|---------------|-------|-------|---------|-----------|-------|--------|--------------|
| cc-pvdz       | 8.39  | 8.41  | 8.44    | 8.58      | 8.66  | 8.53   | 8.79         |
| cc-pvtz       | 10.68 | 10.71 | 10.78   | 10.89     | 11.00 | 10.86  | 11.25        |
| cc-pvqz       | 11.83 | 11.87 | 12.00   | 12.08     | 12.22 | 12.07  | 12.49        |
| aug-cc-pvdz   | 13.48 | 13.61 | 13.81   | 13.91     | 14.16 | 13.54  | 14.74        |
| aug-cc-pvtz   | 13.69 | 13.81 | 14.06   | 14.26     | 14.54 | 13.79  | 15.21        |
| aug-cc-pvqz   | 13.70 | 13.81 | 14.11   | 14.34     | 14.64 | 14.03  | 15.32        |
| d-aug-cc-pvdz | 13.92 | 14.09 | 14.32   | 14.45     | 14.77 | 13.96  | 15.51        |
| d-aug-cc-pvtz | 13.80 | 13.93 | 14.19   | 14.41     | 14.73 | 13.92  | 15.47        |
| d-aug-cc-pvqz | 13.73 | 13.85 | 14.16   | 14.40     | 14.71 | 14.07  | 15.42        |
| <b>Exp</b>    |       |       |         |           |       |        | <b>14.21</b> |

**Table 3:** Calculated isotropic mean polarizabilities ( $\bar{\alpha}$ ) of H<sub>2</sub>SO<sub>4</sub> using different DFT functionals and basis sets compared to coupled cluster and experimental data.

| Basis set     | CC2   | CCSD  | CCSD(T) | CAM-B3LYP | B3LYP | M06-2X | PW91  |
|---------------|-------|-------|---------|-----------|-------|--------|-------|
| cc-pvdz       | 24.98 | 25.20 | 25.52   | 25.43     | 25.85 | 25.23  | 26.75 |
| cc-pvtz       | 29.47 | 29.72 | 30.19   | 30.05     | 30.48 | 29.87  | 31.53 |
| cc-pvqz       | 31.93 | 32.20 | 32.92   | 32.66     | 33.11 | 32.40  | 34.20 |
| aug-cc-pvdz   | 34.31 | 34.80 | 35.46   | 35.04     | 35.59 | 34.13  | 37.31 |
| aug-cc-pvtz   | 34.32 | 34.72 | 35.24   | 35.78     | 34.51 | 37.41  |       |
| aug-cc-pvqz   | -     | -     | -       | 35.29     | 35.82 | 34.63  | 37.33 |
| d-aug-cc-pvdz | 34.97 | 35.48 | 36.19   | 35.71     | 36.27 | 34.71  | 38.00 |
| d-aug-cc-pvtz | 34.47 | 34.88 | 35.87   | 35.41     | 35.95 | 34.63  | 37.58 |
| d-aug-cc-pvqz | -     | -     | -       | 35.32     | 35.85 | 34.65  | 37.41 |
| Exp           |       |       |         |           |       |        | -     |

## Cluster Structures

Minimum identified clusters within each cluster morphology [Site 1 - Site 2] optimized at the M06-2X/6-311++G(3df,3pd) level of theory. The relative stability within each cluster morphology is shown in the brackets ( ) in kcal/mol. The mean anisotropic ( $\Delta\alpha$ ) and isotropic ( $\bar{\alpha}$ ) polarizabilities are calculated at the CAM-B3LYP/aug-cc-pvdz level of theory.

### (H<sub>2</sub>SO<sub>4</sub>)(H<sub>2</sub>O) [0-1] Cluster (0.00), $\Delta\alpha = 10.94$ , $\bar{\alpha} = 44.60$

O 2.66843900 -0.04455000 -0.05534900  
H 3.16246700 0.75743900 -0.23878000  
H 2.25824500 0.07595000 0.81242100  
S -0.57806500 -0.09464700 0.10319800  
O -1.79268900 -0.81554500 0.04316100  
O 0.19956100 -0.02061200 1.29299900  
O 0.32089900 -0.57631800 -1.06039500  
H 1.27738600 -0.37508200 -0.84624900  
O -0.87453100 1.40877000 -0.28129400  
H -1.62248300 1.44207300 -0.89154200

### (H<sub>2</sub>SO<sub>4</sub>)(H<sub>2</sub>O)<sub>2</sub> [0-2] Cluster (0.55 kcal/mol), $\Delta\alpha = 11.64$ , $\bar{\alpha} = 54.46$

O 2.50005300 -1.20457100 -0.09324600  
H 1.61435500 -1.36236700 -0.45686000  
H 2.58640100 -1.78335300 0.66647700  
O 2.05592000 1.40869500 0.15232200  
H 2.50129700 1.86991400 -0.56209500  
H 2.35312900 0.46892100 0.11263800  
S -0.97067900 -0.05670800 -0.12863000  
O -2.36472600 -0.01219200 -0.35997500  
O -0.10839900 -0.80711200 -0.98319200  
O -0.45911000 1.37803000 0.01730500  
H 0.57244900 1.41933800 0.05839000  
O -0.71084100 -0.67831600 1.30728800  
H -1.39994300 -0.38139400 1.91552100

### (H<sub>2</sub>SO<sub>4</sub>)(H<sub>2</sub>O)<sub>2</sub> [1-1] Cluster (0.00 kcal/mol), $\Delta\alpha = 18.46$ , $\bar{\alpha} = 54.34$

O -3.05163600 -0.73526600 0.07231000  
H -3.83442900 -0.58262300 -0.46085800  
H -2.84004200 0.10542500 0.50264700  
O 3.08645500 -0.63479300 0.10039600

H 2.83772000 0.05096500 -0.53533900  
H 3.39105300 -1.38660100 -0.41198800  
S 0.00107300 0.38036400 -0.02366000  
O -1.04810300 1.14104200 0.56954700  
O 1.01090100 1.02404000 -0.79648900  
O 0.67865800 -0.42252300 1.11507100  
H 1.61172300 -0.65289600 0.84776500  
O -0.62782800 -0.71516800 -0.92599300  
H -1.57076600 -0.87875000 -0.64239200

**(H<sub>2</sub>SO<sub>4</sub>)(H<sub>2</sub>O)<sub>3</sub> [0-3] Cluster (1.48 kcal/mol),  $\Delta\alpha = 13.69$ ,  $\bar{\alpha} = 63.52$**

O -1.50695300 -1.37165700 -1.16324800  
H -1.97182900 -1.32823000 -0.31412000  
H -1.77394500 -0.56697200 -1.62131000  
O -2.32533600 -0.35004400 1.33603200  
H -2.80419200 -0.52245500 2.14802600  
H -1.37303500 -0.30824600 1.55172100  
O -1.87651300 1.46659500 -0.65400000  
H -2.24402600 2.35156800 -0.70226900  
H -2.22494000 1.04912900 0.15415400  
S 1.24418200 0.02923400 0.16193500  
O 0.32203500 -0.02795800 1.26628600  
O 2.62090400 0.18411800 0.41414100  
O 1.05611300 -1.23222300 -0.70862400  
H 0.08225700 -1.37210200 -0.91148100  
O 0.78417900 1.19212900 -0.76566200  
H -0.19263700 1.34187600 -0.69509200

**(H<sub>2</sub>SO<sub>4</sub>)(H<sub>2</sub>O)<sub>3</sub> [1-2] Cluster (0.00 kcal/mol),  $\Delta\alpha = 20.10$ ,  $\bar{\alpha} = 64.35$**

O 3.36111200 -0.59223100 0.51322700  
H 3.97860300 -1.08118200 -0.03329600  
H 2.51146400 -1.05780400 0.45341400  
O 2.20598100 1.68653600 -0.22848800  
H 2.14571500 2.26192400 0.53717400  
H 2.76528400 0.91929000 0.03659600  
O -3.40535200 0.61362000 0.50771200  
H -3.26630500 -0.03731500 -0.19539000  
H -3.72748900 1.40928000 0.07920900  
S -0.42960700 -0.44315400 -0.18247600  
O 0.69717800 -1.25566300 0.14309700  
O -1.55870300 -1.03751000 -0.81753500  
O -0.88324000 0.21906600 1.15107100  
H -1.82978600 0.51338700 1.05671100  
O 0.00873600 0.74243700 -1.05534300  
H 0.89053100 1.15284000 -0.72471500

**(H<sub>2</sub>SO<sub>4</sub>)(H<sub>2</sub>O)<sub>4</sub> [0-4] Cluster (3.73 kcal/mol),  $\Delta\alpha = 11.15$ ,  $\bar{\alpha} = 73.13$**

O -1.92274200 -1.89320000 -0.30399400  
H -2.03338300 -2.84521100 -0.34541800  
H -1.03636400 -1.68268100 -0.65850000  
O -1.30909000 -0.40611000 1.78657300  
H -1.49527900 0.55689100 1.42351400  
H -1.70419400 -1.04166500 1.13497400

S 1.39355000 -0.15830900 -0.10870200  
O 0.33013900 -0.59862400 -0.99718500  
O 2.72946400 -0.42025300 -0.51592300  
O 1.22081600 1.44842300 -0.14461500  
H 2.10034200 1.84320800 -0.11625900  
O 1.10299500 -0.52741300 1.28145900  
H -0.26607100 -0.50449200 1.65349300  
O -1.56461900 1.85203900 0.75048800  
H -1.85143600 1.61282300 -0.16172700  
H -0.65485000 2.15721200 0.64197100  
O -2.04123100 0.79336900 -1.67232800  
H -2.58257100 0.00457700 -1.56679200  
H -1.13885100 0.44642700 -1.74183500

**(H<sub>2</sub>SO<sub>4</sub>)(H<sub>2</sub>O)<sub>4</sub> [1-3] Cluster (1.32 kcal/mol),  $\Delta\alpha = 19.88$ ,  $\bar{\alpha} = 73.25$**

O -3.16166500 -0.75937400 -0.39486500  
H -3.80029800 -1.41220100 -0.68568100  
H -2.28170900 -1.11347300 -0.60121700  
O -1.83183100 0.66711700 1.62202100  
H -1.85712300 1.29757700 0.86752100  
H -2.51328400 0.02511900 1.37456100  
O 3.44243500 1.04232400 -0.05361100  
H 3.74217900 1.37288000 0.79622400  
H 3.47557100 0.07661000 0.00234700  
S 0.69425300 -0.62382700 -0.09193100  
O -0.45921200 -1.11646400 -0.77948100  
O 1.92285900 -1.33772100 -0.19059400  
O 0.90834600 0.82357800 -0.65100100  
H 1.84053700 1.11396700 -0.44011800  
O 0.38619500 -0.41106100 1.38516700  
H -0.56289800 0.03806300 1.52927500  
O -1.91110300 1.82535200 -0.82436700  
H -2.48283500 1.10128400 -1.11052600  
H -1.03638300 1.61141200 -1.16764800

**(H<sub>2</sub>SO<sub>4</sub>)(H<sub>2</sub>O)<sub>4</sub> [2-2] Cluster (0.00 kcal/mol),  $\Delta\alpha = 23.62$ ,  $\bar{\alpha} = 74.46$**

O -3.80080400 -0.45444500 -0.46701700  
H -4.39750100 -1.04523000 -0.00455300  
H -2.96056500 -0.93251100 -0.56188500  
O -2.54067000 1.58267100 0.69284000  
H -2.49792700 2.30148900 0.05857400  
H -3.13627400 0.90088400 0.30260900  
O 2.54105700 1.58238100 -0.69285400  
H 3.13625100 0.90035000 -0.30217600  
H 2.49874200 2.30163200 -0.05905700  
S 0.00004000 -0.53509700 -0.00001700  
O -1.15827100 -1.27070700 -0.39481800  
O 1.15834600 -1.27092100 0.39445600  
O 0.33740200 0.41127800 -1.16714800  
H 1.21436500 0.91105400 -0.99485200  
O -0.33729700 0.41065700 1.16762900  
H -1.21394300 0.91075200 0.99530700  
O 3.80010200 -0.45455000 0.46698600

H 2.96007700 -0.93311300 0.56152200  
H 4.39720500 -1.04467300 0.00419900

**(H<sub>2</sub>SO<sub>4</sub>)(H<sub>2</sub>O)<sub>5</sub> [0-5] Cluster (4.14 kcal/mol),  $\Delta\alpha = 19.93$ ,  $\bar{\alpha} = 83.18$**

O 1.28653000 1.89392300 -0.85663300  
H 1.39140100 2.66438400 -1.41776100  
H 0.32553900 1.78061800 -0.70420400  
O 0.84028000 -0.84301400 1.33963100  
H 0.95569200 -1.03726000 0.37440800  
H 1.53244700 -0.09852200 1.50598800  
S -2.01698000 0.07416400 0.05990700  
O -1.20989700 1.02915000 -0.66106700  
O -3.42813500 0.22671900 0.01184400  
O -1.66824500 -1.29597000 -0.73598300  
H -2.36349300 -1.93991200 -0.55626000  
O -1.50009200 -0.16993100 1.41849800  
H -0.18664300 -0.51366000 1.44638700  
O 1.17502100 -0.87972900 -1.31593200  
H 1.24774700 0.08677800 -1.41182600  
H 0.28586500 -1.10422800 -1.61910200  
O 2.65277400 0.90241200 1.36559300  
H 2.30482500 1.51537400 0.69678900  
H 3.31331500 0.37484800 0.88534000  
O 3.83694000 -0.88017100 -0.41758500  
H 3.08382200 -1.21019600 -0.92399900  
H 4.49974300 -1.57196600 -0.42121700

**(H<sub>2</sub>SO<sub>4</sub>)(H<sub>2</sub>O)<sub>5</sub> [1-4] Cluster (0.00 kcal/mol),  $\Delta\alpha = 18.46$ ,  $\bar{\alpha} = 82.99$**

O -2.11176200 1.34149200 -1.50091000  
H -2.13259000 1.84149100 -2.31879900  
H -1.31995200 0.76897900 -1.53194200  
O -1.85609800 -0.48400300 1.72039900  
H -1.74279100 0.52194500 1.57586100  
H -2.39705800 -0.81264200 0.92744400  
S 0.86466300 -0.59679700 -0.16368500  
O -0.25643700 -0.57604000 -1.08988300  
O 2.07707800 -1.17412600 -0.66376500  
O 1.16366600 0.94696600 0.08613400  
H 2.14596900 1.07881500 0.16686100  
O 0.46145600 -1.13479500 1.13893900  
H -0.88240600 -0.83859700 1.54963800  
O -1.34435900 1.93391200 1.10757100  
H -1.71300000 2.01297600 0.21109400  
H -0.38805900 1.88130000 0.96297600  
O -2.94887000 -1.21367300 -0.49185100  
H -3.16576600 -0.38035200 -0.93269600  
H -2.10032100 -1.45322900 -0.89443500  
O 3.79636800 0.82420500 0.14344200  
H 3.66224500 -0.06946400 -0.20940800  
H 4.35078800 1.28603600 -0.48823200

**(H<sub>2</sub>SO<sub>4</sub>)(H<sub>2</sub>O)<sub>5</sub> [2-3] Cluster (2.14 kcal/mol),  $\Delta\alpha = 22.45$ ,  $\bar{\alpha} = 83.45$**

O -3.57936300 0.44693600 -1.06903200

H -4.20448100 0.25393800 -1.76921000  
H -2.76149100 -0.03354200 -1.28230100  
O -2.64773500 0.18345600 1.57286100  
H -2.32552300 1.07097900 1.30786400  
H -3.34044600 0.01123700 0.91917300  
S -0.04594100 -0.85921200 -0.23360700  
O -1.04828400 -0.58991300 -1.22199100  
O 0.99593900 -1.78069800 -0.53976100  
O 0.59005900 0.52207000 0.10381800  
H 1.55040000 0.37856600 0.42618400  
O -0.70459100 -1.30521200 1.06921600  
H -1.53147000 -0.71103700 1.31097100  
O -1.76117200 2.34785600 0.16304100  
H -2.36496900 2.06887700 -0.53723600  
H -0.89605600 2.00951400 -0.09540500  
O 2.93552000 -0.14295200 0.78424300  
H 2.85782900 -1.03006800 0.41101500  
H 3.70562100 0.27678200 0.36599200  
O 5.12893500 1.09955500 -0.39783700  
H 5.75562000 1.57298300 0.15314500  
H 5.01557600 1.63038500 -1.18893700

**(H<sub>2</sub>SO<sub>4</sub>)(H<sub>2</sub>O)<sub>6</sub> [0-6] Cluster (11.71 kcal/mol),  $\Delta\alpha = 20.28$ ,  $\bar{\alpha} = 92.05$**

O 1.36857300 -0.47891100 -1.44147600  
H 0.65041000 -0.84104500 -1.96909500  
H 1.03983600 -0.53753700 -0.52279000  
O -0.06458800 1.93523100 -0.31663500  
H 0.31592400 1.34193100 0.37123400  
H 0.19363900 1.49951900 -1.13924100  
S -2.48460700 -0.28152900 -0.08916000  
O -1.40907800 -0.76472200 -0.88744600  
O -3.80996000 -0.73921700 -0.27221100  
O -2.04789400 -0.63433300 1.40160200  
H -2.82029300 -0.57619200 1.97901900  
O -2.49191500 1.25084600 -0.09259600  
H -1.53241800 1.61548800 -0.18539200  
O 0.84656100 -0.06119600 1.21507200  
H 1.78531800 -0.14482400 1.54034200  
H 0.24212300 -0.54997600 1.77755500  
O 3.02071800 1.76418600 -0.47668700  
H 2.33781200 2.43277300 -0.37496600  
H 2.63992300 1.10384600 -1.06908000  
O 3.41514200 -0.10831300 1.61768800  
H 3.71490900 -0.82677400 1.03896000  
H 3.53695000 0.68326900 1.07030300  
O 3.75801200 -1.73994100 -0.62667700  
H 2.95585200 -1.48011000 -1.10357000  
H 4.00915000 -2.60493400 -0.95180200

**(H<sub>2</sub>SO<sub>4</sub>)(H<sub>2</sub>O)<sub>6</sub> [1-5] Cluster (3.81 kcal/mol),  $\Delta\alpha = 25.43$ ,  $\bar{\alpha} = 92.72$**

O -2.15543100 -1.32901800 -0.93887600  
H -1.52365000 -2.00566300 -1.19751100  
H -1.74975000 -0.47766400 -1.21987200

O -1.29654300 -0.56659800 1.59830900  
H -1.77681000 0.27864200 1.61017900  
H -1.59866600 -1.00243600 0.77740000  
S 1.63805000 -0.60699200 0.04174800  
O 0.69716200 -1.37537900 -0.70345700  
O 3.01666800 -0.97676500 0.04933600  
O 1.54448400 0.85382400 -0.53707500  
H 2.42605900 1.31008800 -0.43757200  
O 1.17256500 -0.46041700 1.48351100  
H 0.11954900 -0.48142500 1.55793000  
O -1.25834200 1.18437500 -1.32641000  
H -1.66159300 1.62631700 -0.56656400  
H -0.30472300 1.22354000 -1.18657700  
O -4.51795000 -0.08594000 -0.33045300  
H -3.85695100 -0.74297800 -0.60771400  
H -4.96624300 0.18395600 -1.13409500  
O 4.02762300 1.60372700 -0.17431400  
H 4.22789800 0.66801200 -0.02327400  
H 4.58687100 1.89020200 -0.89928000  
O -2.88388900 1.63128600 0.95777700  
H -3.59803400 1.10441100 0.53631500  
H -3.30352000 2.30410200 1.49588300

**(H<sub>2</sub>SO<sub>4</sub>)(H<sub>2</sub>O)<sub>6</sub> [2-4] Cluster (4.00 kcal/mol),  $\Delta\alpha = 26.09$ ,  $\bar{\alpha} = 93.69$**

O -3.16080500 0.18609400 -1.37850800  
H -3.52253500 0.14276100 -2.26554500  
H -2.24469600 -0.14937600 -1.43753100  
O -1.58297900 -0.00790200 1.83999600  
H -1.71751900 0.85901700 1.38825000  
H -2.38987500 -0.53057400 1.64075100  
S 0.63878000 -0.40921400 -0.55672000  
O -0.56084800 -0.53810800 -1.33308500  
O 1.82709700 -1.00852000 -1.08260500  
O 0.86471200 1.12690000 -0.41858100  
H 1.78815300 1.32922700 -0.02591200  
O 0.43515100 -0.90037400 0.85299500  
H -0.50807700 -0.52064700 1.32337200  
O -1.83001600 2.13757300 0.23483700  
H -2.41191100 1.75784500 -0.43825600  
H -0.94632200 2.11357600 -0.15296000  
O 3.17987300 1.56376300 0.54167800  
H 3.62291900 0.68989900 0.63561300  
H 3.73846200 2.08939500 -0.03485700  
O -3.84389400 -1.18652700 0.94179000  
H -3.82572100 -0.76832900 0.06451500  
H -4.68976500 -0.96590700 1.33482900  
O 4.01547700 -0.97914200 0.62016100  
H 3.31069800 -1.26303500 0.01479000  
H 4.82556100 -1.38649400 0.31104300

**(H<sub>2</sub>SO<sub>4</sub>)(H<sub>2</sub>O)<sub>6</sub> [3-3] Cluster (0.00 kcal/mol),  $\Delta\alpha = 23.37$ ,  $\bar{\alpha} = 92.56$**

O 3.74429800 -0.74218900 -0.67479900  
H 4.35907600 -1.20804200 -1.24348100



H 2.85045800 -0.95907700 -0.98693300  
O 2.57307800 1.61623200 0.28552700  
H 2.57248200 1.01736600 1.06679900  
H 3.21295700 1.18563500 -0.30044100  
S -0.06108100 -0.19038300 -0.57972900  
O 1.03103100 -0.98464200 -1.05546100  
O -1.32204100 -0.32082300 -1.26441800  
O -0.24797800 -0.50205000 0.90161700  
H -1.24501400 -0.19258500 1.28165300  
O 0.30128700 1.29736100 -0.64219700  
H 1.27796700 1.47299700 -0.26516700  
O 2.52536500 -0.50860500 1.95234400  
H 1.62188400 -0.82088200 1.82184400  
H 3.06003200 -0.99059700 1.30871100  
O -3.41284900 -1.75597800 -0.01304000  
H -2.76871800 -1.46750700 -0.67630100  
H -4.23297900 -1.92934200 -0.47717000  
O -2.68538800 2.04333100 -0.30184800  
H -2.31773500 1.40692500 -0.93170500  
H -2.04484800 2.75870700 -0.28291900  
O -2.46731000 0.15221500 1.63861700  
H -2.65792000 0.95872300 1.11248100  
H -3.02629500 -0.54500800 1.23754400

**(H<sub>2</sub>SO<sub>4</sub>)(H<sub>2</sub>O)<sub>7</sub> [0-7] Cluster (1.30 kcal/mol),  $\Delta\alpha = 14.69$ ,  $\bar{\alpha} = 101.88$**

O 0.24550500 2.14954100 -0.21150000  
H -0.62064200 2.59043100 -0.35005600  
H 0.15654100 1.30180800 -0.67426700  
O 0.52273700 0.97002600 2.06746800  
H 1.49457200 0.46278800 1.89436200  
H 0.39862400 1.56757400 1.26289100  
S -1.56114300 -0.77640200 0.00817300  
O -0.27911800 -0.63828500 -0.67974600  
O -2.62002200 0.02067700 -0.54910500  
O -1.92037900 -2.29699100 -0.27769500  
H -2.80696500 -2.48561300 0.05401100  
O -1.42330400 -0.65906100 1.44983200  
H -0.21758900 0.30654600 1.98244900  
O 1.81405500 -2.23524500 0.09765900  
H 1.60569300 -3.13229500 0.36570800  
H 0.96845700 -1.80353900 -0.12707800  
O 2.66041900 -0.05355500 1.54541000  
H 2.50544900 -0.93644500 1.15968600  
H 2.94964100 0.52147800 0.78635000  
O 2.18455800 -0.56608800 -2.24688800  
H 1.22129300 -0.57149300 -2.21762600  
H 2.42865800 -1.34061500 -1.72597100  
O 3.06129200 1.47863000 -0.57115800  
H 2.82914400 0.86429700 -1.29230000  
H 2.35593100 2.13588600 -0.56648700  
O -2.33723400 2.80335800 -0.62727300  
H -2.63137200 1.87727300 -0.61675000  
H -2.92723200 3.28029300 -0.04170900

**(H<sub>2</sub>SO<sub>4</sub>)(H<sub>2</sub>O)<sub>7</sub> [1-6] Cluster (3.16 kcal/mol),  $\Delta\alpha = 24.81$ ,  $\bar{\alpha} = 102.93$**

O -2.01792100 -1.96075200 -0.98839300  
H -1.15107400 -1.64113000 -1.28704300  
H -2.66155900 -1.29726700 -1.29363300  
O -1.66904900 -1.50047400 1.47229800  
H -2.25915300 -0.67567500 1.57485900  
H -1.83292700 -1.79245900 0.49698200  
S 1.34672100 -0.58959100 0.14623700  
O 0.35174700 -0.49676200 -0.91893300  
O 2.37917500 -1.55644900 -0.09829200  
O 2.05688000 0.82727900 0.18557500  
H 2.98751700 0.74077900 -0.15952400  
O 0.70510800 -0.69198200 1.45346200  
H -0.68398800 -1.19371800 1.51993400  
O -1.45317200 1.54627400 -0.57192000  
H -0.90952700 2.32311200 -0.34343600  
H -0.80018600 0.83840000 -0.74251600  
O -3.07664600 0.61559400 1.38987200  
H -2.48620500 1.08876800 0.76328300  
H -3.87573200 0.45163500 0.87750200  
O 4.45391100 0.15446800 -0.64461900  
H 4.11288300 -0.75162300 -0.57836000  
H 4.73650400 0.27299200 -1.55354600  
O 0.52815700 3.23950100 0.28253800  
H 0.49663300 3.61167900 1.16578100  
H 1.15157200 2.49963500 0.33260800  
O -3.66503000 0.26903900 -1.48680200  
H -2.96655500 0.94343100 -1.41745200  
H -4.15102400 0.44900800 -2.29351700

**(H<sub>2</sub>SO<sub>4</sub>)(H<sub>2</sub>O)<sub>7</sub> [2-5] Cluster (1.98 kcal/mol),  $\Delta\alpha = 24.54$ ,  $\bar{\alpha} = 103.13$**

O 0.94010300 -0.76417000 2.28293400  
H 0.84129600 -1.14833500 3.15579000  
H 0.06085400 -0.80982600 1.82702200  
O 2.01653700 -1.72798100 0.08783700  
H 1.77786100 -1.44805900 1.00863100  
H 2.92251400 -1.32130200 -0.19182700  
S -1.06886800 -0.43503700 -0.66931900  
O -1.15611100 -0.88101600 0.72330700  
O -2.23753400 -0.74954100 -1.43693300  
O -0.93231700 1.13162700 -0.61759400  
H -1.81402100 1.53295500 -0.31605100  
O 0.18920500 -0.84926800 -1.29280600  
H 1.23174000 -1.37207400 -0.53460600  
O 1.48262800 1.66617600 0.84455400  
H 1.36469800 1.04157200 1.57027700  
H 0.68030300 1.59691300 0.30744700  
O -3.21185000 1.98454600 0.21246100  
H -3.76234000 2.41716700 -0.44348100  
H -3.66571600 1.14058400 0.44232200  
O -4.10628400 -0.52182800 0.67071900  
H -3.78947500 -0.82266100 -0.19467300

H -3.41344100 -0.84357300 1.25805700  
O 4.18868400 -0.71177000 -0.63528000  
H 5.01116500 -1.01227100 -0.24530200  
H 4.15910000 0.28068800 -0.55322200  
O 3.90237200 1.84807100 -0.27578800  
H 3.00431200 1.87105600 0.12569200  
H 3.88960000 2.45899400 -1.01427100

**(H<sub>2</sub>SO<sub>4</sub>)(H<sub>2</sub>O)<sub>7</sub> [3-4] Cluster (0.00 kcal/mol),  $\Delta\alpha = 27.90$ ,  $\bar{\alpha} = 102.72$**

O 3.26298600 -1.54701000 -0.63276300  
H 3.51540000 -2.34224300 -1.10538700  
H 2.35842700 -1.30686900 -0.93229100  
O 2.16879600 1.49190700 0.99299800  
H 2.19879700 0.57724300 1.44832800  
H 2.89104200 1.46274000 0.29667400  
S -0.29787000 -0.02821800 -0.52038400  
O 0.87546200 -0.55885000 -1.17195100  
O -1.51529500 -0.07509500 -1.29597200  
O -0.49940900 -0.93725500 0.73730000  
H -1.42171700 -0.73352300 1.17662600  
O -0.07020800 1.33722300 -0.00469700  
H 1.20892600 1.51154400 0.52901900  
O 2.12290500 -0.90152800 1.87457800  
H 2.63571200 -1.38075400 1.20521800  
H 1.19852100 -1.13867600 1.69772800  
O -2.77076400 -0.41494200 1.66115900  
H -2.93816800 0.51184900 1.42389700  
H -3.35626400 -0.88695000 1.03588600  
O -4.11020700 -1.14543300 -0.63284600  
H -4.51544900 -0.27653300 -0.72610200  
H -3.26828600 -1.05435200 -1.10020500  
O 4.05109600 1.08420100 -0.73595300  
H 3.98621800 0.11649700 -0.83675100  
H 4.96454000 1.28982900 -0.52859700  
O -3.36683600 1.68649200 -0.10444500  
H -2.65509900 1.30925000 -0.64652100  
H -3.22489100 2.63476000 -0.11064900

**(H<sub>2</sub>SO<sub>4</sub>)(H<sub>2</sub>O)<sub>8</sub> [0-8] Cluster (11.79 kcal/mol),  $\Delta\alpha = 17.88$ ,  $\bar{\alpha} = 111.98$**

O -0.34069700 2.51132600 0.96967200  
H -0.85059300 2.76405400 0.19034200  
H 0.56181300 2.37598600 0.65544600  
O -0.47891300 0.30657200 -1.39177600  
H -0.36830200 -0.72907000 -1.49445500  
H -1.31525600 0.42475700 -0.82549800  
S 2.41979300 -0.15659300 0.15772900  
O 1.50468500 -1.20229000 0.57207000  
O 3.44202000 0.23082800 1.06748200  
O 3.12510700 -0.80475600 -1.11576800  
H 3.96597500 -0.35673100 -1.26587400  
O 1.66501200 1.00083400 -0.38120500  
H 0.40666700 0.64332800 -0.92324100  
O -0.21991300 -2.17340500 -1.38541500

H 0.43136400 -2.20974600 -0.66407000  
H -1.07060900 -2.48800800 -1.03587800  
O -2.77919300 0.43141100 -0.31940800  
H -2.93839100 0.11610700 0.62423200  
H -3.10433800 1.33046100 -0.42653700  
O -2.90129000 -2.35885200 -0.59336100  
H -3.13968000 -1.43672700 -0.77064700  
H -3.53346600 -2.90141600 -1.06891000  
O -3.03273600 -0.69759900 1.96840900  
H -2.08785700 -0.55244800 2.22187800  
H -3.10307300 -1.62181700 1.71186600  
O -1.84566800 2.84177000 -1.53041200  
H -1.91233400 3.69326500 -1.96807700  
H -1.34330100 2.27120100 -2.12252000  
O -0.51774500 0.00899600 2.25472800  
H -0.48532500 0.90480000 1.87841600  
H 0.20466700 -0.48118800 1.83973200

**(H<sub>2</sub>SO<sub>4</sub>)(H<sub>2</sub>O)<sub>8</sub> [1-7] Cluster (3.17 kcal/mol),  $\Delta\alpha = 23.68$ ,  $\bar{\alpha} = 111.95$**

O 1.60105700 -1.32769200 1.22167400  
H 0.67898800 -1.45124200 1.48703100  
H 1.93096600 -0.55783400 1.71639300  
O 0.84778800 -0.76204500 -1.32707400  
H 1.16928700 0.10031600 -1.65273400  
H 1.19928300 -0.86956800 -0.41469400  
S -2.11245100 -0.70176800 0.18785900  
O -1.20635900 -1.18690100 1.17774600  
O -3.49048300 -1.06019100 0.26033500  
O -2.01796100 0.86583300 0.26863400  
H -2.87793400 1.26409900 -0.04905400  
O -1.60511700 -1.03023200 -1.20719000  
H -0.55547400 -0.91142100 -1.28770100  
O 0.59656800 2.15970100 0.59924600  
H 0.94144700 2.16923200 -0.30732700  
H -0.27088400 1.73975900 0.55881100  
O 3.89901500 0.69654000 -0.36775700  
H 3.65765900 0.85884500 0.55615100  
H 3.92589500 -0.27201400 -0.47670700  
O -4.43435400 1.44466500 -0.52978500  
H -4.67417700 0.52373900 -0.35050800  
H -5.04482700 1.99089700 -0.03042300  
O 1.96645600 1.68954500 -1.79182100  
H 2.79585700 1.38794900 -1.32606000  
H 2.22195600 2.17895700 -2.57473000  
O 2.52697500 1.11762800 2.07649700  
H 2.70630400 1.55327400 2.91057500  
H 1.77899900 1.59056400 1.63849600  
O 3.59139500 -2.07133000 -0.64230400  
H 3.03148100 -2.18903800 -1.41471100  
H 2.98456000 -2.16239300 0.10584700

**(H<sub>2</sub>SO<sub>4</sub>)(H<sub>2</sub>O)<sub>8</sub> [2-6] Cluster (0.78 kcal/mol),  $\Delta\alpha = 27.86$ ,  $\bar{\alpha} = 112.02$**

O -2.16409900 2.37931000 -0.22026500

H -2.31971600 3.30626200 -0.40976400  
H -1.19856200 2.27680300 -0.09738500  
O -0.97668400 -1.09978600 -1.39405800  
H -1.10202800 -1.48000700 -0.48099800  
H -1.84782300 -0.53281500 -1.57668100  
S 1.34307100 0.85178200 0.00657800  
O 0.38245900 1.82057700 0.50135800  
O 2.71477300 1.26051500 0.11184800  
O 1.10778100 -0.39398400 0.93970500  
H 1.66353400 -1.15633200 0.58232800  
O 1.01103500 0.36875800 -1.34765300  
H -0.13629000 -0.46764400 -1.39529200  
O -1.68008800 -1.87625000 1.01398900  
H -1.63537300 -0.98553600 1.46616800  
H -1.15013200 -2.48312500 1.53545200  
O 2.54651800 -2.18322800 -0.25646800  
H 2.28376500 -2.03448800 -1.16995800  
H 3.44365400 -1.78957500 -0.18581400  
O 4.71735000 -0.63264500 0.07458100  
H 5.43517500 -0.43792600 -0.52920300  
H 4.15592300 0.16291600 0.10088100  
O -3.05237900 0.22720000 -1.64096400  
H -2.85274400 1.08368400 -1.21423800  
H -3.67856800 -0.23961500 -1.05605100  
O -4.29918200 -1.30663700 0.25011500  
H -3.53467100 -1.77471100 0.61869100  
H -5.01861800 -1.93724100 0.19842100  
O -1.66814600 0.53771600 1.99097400  
H -2.30178300 1.11477900 1.54846100  
H -0.80958200 0.93369100 1.77444100

**(H<sub>2</sub>SO<sub>4</sub>)(H<sub>2</sub>O)<sub>8</sub> [3-5] Cluster (3.15 kcal/mol),  $\Delta\alpha = 27.06$ ,  $\bar{\alpha} = 112.10$**

O 2.96509800 -2.01026600 -0.92149400  
H 3.50430700 -1.21988900 -1.06151600  
H 2.11766100 -1.79837700 -1.33135200  
O 1.86497400 1.99650500 -0.27418900  
H 2.23058300 1.78621600 0.60482900  
H 2.50130100 1.58986200 -0.88044900  
S -0.70199100 -0.16554000 -0.68029300  
O 0.38918300 -0.81145300 -1.32932400  
O -2.02921800 -0.38339000 -1.18873800  
O -0.65979300 -0.57244900 0.80304500  
H -1.55317900 -0.28367800 1.30885300  
O -0.50194300 1.35366900 -0.67439700  
H 0.49492200 1.61671100 -0.49974700  
O 2.06816800 -1.39959300 1.58828900  
H 2.40588200 -1.76416600 0.74295400  
H 1.12348100 -1.26616500 1.44595300  
O -2.78570800 0.08160300 1.87244000  
H -3.06265300 0.91421400 1.45697200  
H -3.42896100 -0.55609900 1.49311300  
O -4.42982600 -1.29922100 0.19708900  
H -4.88123600 -0.49708200 -0.08869700

H -3.71592800 -1.40031000 -0.44569900  
O 4.24552100 0.56042300 -0.81425000  
H 5.11686000 0.80795200 -1.12795300  
H 4.24295900 0.67035600 0.15306300  
O -3.84586200 1.55972300 -0.25085000  
H -3.19121700 1.09394600 -0.79406300  
H -3.89174800 2.45381300 -0.59434000  
O 3.31406600 0.85699900 1.75177100  
H 2.83475600 -0.02349400 1.79459000  
H 3.62678400 1.06443700 2.63305500

**(H<sub>2</sub>SO<sub>4</sub>)(H<sub>2</sub>O)<sub>8</sub> [4-4] Cluster (0.00 kcal/mol),  $\Delta\alpha = 17.88$ ,  $\bar{\alpha} = 110.55$**

O -1.79847600 1.44837400 1.47178200  
H -1.11420700 0.81648100 1.19652900  
H -2.21849600 1.02284500 2.22522200  
O -2.82910100 -1.61989300 -0.41274600  
H -2.77185200 -1.67160900 0.55470000  
H -3.15596300 -0.71290800 -0.61956500  
S 0.23487500 -0.48645800 -0.81881300  
O -0.47014400 0.64934100 -1.37919000  
O 1.60660600 -0.60288000 -1.27094800  
O 0.18753200 -0.42438200 0.67839500  
H 1.58172100 -0.10221500 1.32738800  
O -0.48428900 -1.77271700 -1.21703100  
H -1.49711200 -1.74038100 -0.91563600  
O -1.88824000 -1.47066100 2.23069200  
H -1.79225300 -2.21186900 2.83156800  
H -1.02630600 -1.34299000 1.80405500  
O 2.52971500 0.20314300 1.50508300  
H 2.59993900 1.03560600 0.81903000  
H 3.09568800 -0.53795800 1.13219500  
O 0.08269300 3.03374200 -0.01167100  
H -0.46627800 2.97790500 0.77931400  
H -0.28203400 2.35037000 -0.59694100  
O -3.30775000 0.98286600 -0.92883500  
H -2.95535300 1.32734200 -0.09326300  
H -2.55208400 1.05008500 -1.52460700  
O 3.54122600 -1.78464100 0.22757500  
H 4.40786600 -1.97036100 -0.13710300  
H 2.93510800 -1.61012100 -0.51582900  
O 2.50742700 1.99727300 -0.16269200  
H 2.37546700 1.48299900 -0.97167100  
H 1.66055500 2.50360400 -0.03769600

**(H<sub>2</sub>SO<sub>4</sub>)(H<sub>2</sub>O)<sub>9</sub> [0-9] Cluster (1.78 kcal/mol),  $\Delta\alpha = 14.85$ ,  $\bar{\alpha} = 121.99$**

O 0.85517900 1.86266200 0.19671100  
H 0.54153200 1.57860300 1.08334200  
H 0.11734000 1.64237100 -0.39105300  
O -0.93027600 -2.55213900 0.12227200  
H -0.40126400 -2.27527500 -0.74181000  
H -0.35628000 -2.38473800 0.92552200  
S -2.46789000 0.46524500 -0.25508400  
O -1.29284500 0.51732000 -1.10325700

O -2.47491200 1.40398600 0.83438600  
O -3.63739700 0.88717900 -1.23668300  
H -4.43742900 1.05313900 -0.72322000  
O -2.78704800 -0.90002100 0.17233700  
H -1.73911000 -1.90285500 0.16383300  
O 0.15482600 -1.70082900 -1.93354400  
H 1.12366400 -1.58151800 -1.96939800  
H -0.25882600 -0.82121100 -1.91626100  
O 2.97146600 -1.70163600 1.02380200  
H 3.20889400 -0.77879000 0.82935100  
H 3.02614400 -2.12353800 0.15763700  
O 2.88646600 -1.44074100 -1.85279500  
H 3.40050400 -1.55349600 -2.65404700  
H 3.11612300 -0.56354500 -1.47445600  
O 3.20089800 0.71057400 -0.31045500  
H 2.28748900 1.05237300 -0.15328400  
H 3.71879600 1.52587000 -0.34648300  
O 0.61538600 -1.96534100 2.13065200  
H 1.53569700 -1.86363200 1.76112600  
H 0.67930300 -2.54134600 2.89555800  
O 3.11111800 3.48655400 -0.28226800  
H 3.27896200 4.30734700 0.18162500  
H 2.20058900 3.23287200 -0.06839000  
O -0.21785200 0.85145100 2.47167400  
H -0.06586800 -0.10141800 2.48600500  
H -1.13009400 0.98270900 2.17309200

**(H<sub>2</sub>SO<sub>4</sub>)(H<sub>2</sub>O)<sub>9</sub> [1-8] Cluster (1.48 kcal/mol),  $\Delta\alpha = 28.39$ ,  $\bar{\alpha} = 121.88$**

O 1.24700400 -0.99780600 -0.91068300  
H 1.09567300 -0.52010900 -0.06693800  
H 0.55427900 -1.66984600 -0.91176600  
O -0.32931000 1.04114700 -2.00829500  
H 0.07709900 1.78225400 -1.51656400  
H 0.25361000 0.28161100 -1.82436000  
S -2.59639100 -0.69192900 -0.28056800  
O -1.46567800 -1.54217500 -0.46270000  
O -3.90286200 -1.25727500 -0.19912700  
O -2.32220200 0.07952400 1.06405200  
H -3.18920800 0.41508100 1.42713000  
O -2.61406300 0.40425900 -1.33573200  
H -1.63424200 0.70360400 -1.62491200  
O 0.55534400 0.50288700 1.27597500  
H -0.37620300 0.30820900 1.43861300  
H 0.58654600 1.39907800 0.90123700  
O 3.43195600 1.64170600 -0.25092600  
H 3.70401700 0.93779700 -0.85364700  
H 3.46629600 1.23337600 0.64440500  
O -4.80468600 0.58382000 1.71541700  
H -5.26210300 1.37671200 1.42733700  
H -5.05685800 -0.11653500 1.09610800  
O 3.28439700 0.36901000 2.12213100  
H 3.70229500 -0.49103000 1.94895200  
H 2.33284300 0.21337400 2.16135700

O 4.58872800 -1.89981600 1.13958800  
H 4.51571800 -1.66156500 0.20153500  
H 5.52524000 -1.97837700 1.32720600  
O 3.88862300 -0.96166500 -1.41586800  
H 4.14165500 -1.29207400 -2.27933200  
H 2.92465500 -1.11211400 -1.32354100  
O 1.07363200 2.69423300 -0.36201700  
H 2.01511800 2.35246200 -0.39656900  
H 1.11876400 3.64615300 -0.26168800

**(H<sub>2</sub>SO<sub>4</sub>)(H<sub>2</sub>O)<sub>9</sub> [2-7] Cluster (2.86 kcal/mol),  $\Delta\alpha = 29.38$ ,  $\bar{\alpha} = 123.12$**

O -1.97171600 1.43145800 -0.27194600  
H -2.39216400 0.56441500 -0.09312900  
H -1.23864900 1.23002600 -0.87057600  
O -0.95189400 -2.45265200 0.06598600  
H -1.76163200 -2.03313900 -0.26302400  
H -0.98042100 -2.26506000 1.02135600  
S 1.53621700 -0.44486100 -1.09819500  
O 0.36422500 0.33198200 -1.35588000  
O 2.68662600 -0.26624600 -1.92098300  
O 1.94310600 -0.13920900 0.37918700  
H 2.96366600 -0.17652800 0.46560900  
O 1.18497200 -1.92772800 -1.09071400  
H 0.27840000 -2.12636600 -0.61104600  
O -0.30176700 0.88480200 1.93563200  
H -0.86867700 1.27694600 1.24984300  
H 0.51533500 0.65198800 1.47629400  
O 4.46889800 -0.22261400 0.29399800  
H 4.48649000 -0.26576800 -0.67091200  
H 4.94495900 0.58539200 0.54942000  
O 5.78654200 2.10361000 1.07607600  
H 6.40648600 2.07840700 1.80785700  
H 5.28798000 2.91713700 1.17775800  
O -3.23672600 -0.91074300 0.33474600  
H -3.08817800 -1.07023900 1.27655000  
H -4.17004800 -0.64441600 0.20058900  
O -1.55319500 -1.37255000 2.52903400  
H -1.06764600 -0.51603800 2.42189700  
H -1.47506500 -1.63548700 3.44672400  
O -4.39912100 2.55079000 -0.87534700  
H -3.46465000 2.30309500 -0.73780400  
H -4.53525800 3.36188500 -0.38375900  
O -5.63628400 0.22215500 -0.17013200  
H -5.30509500 1.10374300 -0.43688300  
H -6.18462600 -0.08665300 -0.89290000

**(H<sub>2</sub>SO<sub>4</sub>)(H<sub>2</sub>O)<sub>9</sub> [3-6] Cluster (0.00 kcal/mol),  $\Delta\alpha = 34.91$ ,  $\bar{\alpha} = 122.10$**

O -2.75604000 -1.12709000 -0.65472800  
H -3.69674300 -1.38756400 -0.58381400  
H -2.19722900 -1.89988400 -0.78179200  
O -1.60098100 0.24817300 1.36285900  
H -1.73062900 1.17001400 1.08248000  
H -2.06979300 -0.28648700 0.67951000



S 1.06901200 -0.94293600 -0.19897600  
O -0.04041900 -1.62833100 -0.77443100  
O 2.34364300 -1.59450100 -0.17466400  
O 1.19030100 0.40010000 -0.95927500  
H 1.97617900 0.96065400 -0.57295500  
O 0.76452700 -0.52331100 1.24576800  
H -0.21930600 -0.17343100 1.33301900  
O -1.53258400 1.04422200 -1.93541300  
H -1.96902400 0.20542500 -1.71434100  
H -0.59040700 0.86935100 -1.82153900  
O 3.07308100 1.66681700 0.10202000  
H 3.24609100 1.20108800 0.93308900  
H 3.92221000 1.57481800 -0.37190700  
O 5.54164500 0.81527900 -0.68825400  
H 6.40683700 1.22258400 -0.63047800  
H 5.46248900 0.21273600 0.06681800  
O -4.60003300 0.96521400 1.24261600  
H -4.03195100 0.64144900 1.94739600  
H -4.03535800 1.57523200 0.74194300  
O 4.30534400 -0.53075000 1.42035400  
H 4.44888700 -0.99788200 2.24469600  
H 3.65300300 -1.05333000 0.91771100  
O -2.53534000 2.47850600 0.02613600  
H -2.15683200 2.07346400 -0.79639100  
H -2.43450200 3.42876100 -0.04123900  
O -5.36839400 -1.29234700 -0.10211100  
H -5.25962100 -0.44208800 0.36733700  
H -6.10649400 -1.18379200 -0.70293400

**(H<sub>2</sub>SO<sub>4</sub>)(H<sub>2</sub>O)<sub>9</sub> [4-5] Cluster (0.52 kcal/mol),  $\Delta\alpha = 36.06$ ,  $\bar{\alpha} = 121.88$**

O 3.40770100 -1.59304900 -0.03949000  
H 2.83640900 -2.35401300 -0.17470600  
H 2.99184900 -1.08403600 0.69346800  
O 2.35071000 0.40407300 -1.64877900  
H 2.79998000 1.13896100 -1.19728200  
H 2.72637100 -0.39833100 -1.23425800  
S -0.45672800 -0.69300700 -0.27339200  
O 0.54288200 -1.69304700 -0.10680400  
O -1.82290800 -1.08558200 -0.46034500  
O -0.38118300 0.20795300 0.99514200  
H -1.16780300 0.86529300 1.01480500  
O -0.10252600 0.24291100 -1.42525000  
H 0.94643300 0.35073000 -1.52925800  
O 2.46172000 0.18758900 1.74400100  
H 2.79499700 1.00964600 1.35923500  
H 1.49947500 0.23230500 1.68752600  
O -2.41963000 1.70938500 0.97279800  
H -2.88935600 1.55545300 0.08819300  
H -2.31333200 2.65588500 1.08618200  
O -3.89513200 -0.75989900 1.53650300  
H -3.21798400 -1.13472000 0.95641700  
H -3.53504900 0.10045400 1.77832500  
O 5.67387400 -0.06572600 0.11331100

H 6.15156100 -0.25569000 0.92300600  
H 5.06530500 -0.81335400 -0.01349000  
O -3.55468700 1.14099100 -1.25611200  
H -3.03196500 0.37112900 -1.51343500  
H -4.44724500 0.78953300 -1.06678300  
O -5.77826800 -0.13300400 -0.34490400  
H -5.27322500 -0.43771900 0.43378700  
H -6.64801300 0.12326600 -0.03772100  
O 3.90370500 1.96211000 0.05354200  
H 4.65840700 1.33251600 0.08506800  
H 4.27076300 2.84314900 -0.03371300

**(H<sub>2</sub>SO<sub>4</sub>)(H<sub>2</sub>O)<sub>10</sub> [0-10] Cluster (2.75 kcal/mol),  $\Delta\alpha = 15.27$ ,  $\bar{\alpha} = 131.64$**

O -0.77887300 1.35270400 1.82307500  
H -1.70969400 1.05549700 2.11117600  
H -0.83875700 1.91892500 0.90190500  
O 0.47429500 -0.83336100 1.25290100  
H 0.93806900 -0.73464100 0.39092700  
H -0.23606900 0.52269600 1.62785100  
S -2.41736900 -0.66317900 -0.69721800  
O -1.31858500 -0.00302000 -1.37917000  
O -3.46993600 0.24159000 -0.28410500  
O -3.02626300 -1.58012800 -1.84071100  
H -3.82950600 -2.00351200 -1.51492100  
O -1.99299800 -1.55396600 0.36993300  
H -0.33840900 -1.32446700 1.01787900  
O 1.36665200 -0.64474500 -1.29536000  
H 0.46395800 -0.45504400 -1.59960700  
H 1.92738500 0.12615400 -1.48494300  
O 4.19788000 -0.38959400 0.50379700  
H 3.80525300 -0.52895600 1.38190500  
H 4.07401000 -1.22991700 0.02922700  
O 3.31014000 1.33571200 -1.21467300  
H 3.68571100 0.75266800 -0.49212200  
H 3.98998400 1.40754100 -1.88747700  
O 1.54383700 3.39655900 -0.97605800  
H 2.24722200 2.72000600 -1.00245100  
H 1.91651400 4.17215500 -0.55492800  
O 2.78578900 -1.07422600 2.80899900  
H 1.88662100 -1.09239600 2.44613300  
H 2.73122500 -0.62257800 3.65218100  
O -0.90101000 2.54306000 -0.30526500  
H -1.16032700 1.84355600 -0.92816600  
H -0.02377300 2.88910700 -0.58853800  
O -3.13489000 0.53248400 2.38491800  
H -3.45892100 0.46396400 1.46199600  
H -3.10527500 -0.37826900 2.69147900  
O 3.43103700 -2.49994400 -1.13851900  
H 2.57654400 -2.08115300 -1.32585700  
H 3.23954400 -3.39546600 -0.85626200

**(H<sub>2</sub>SO<sub>4</sub>)(H<sub>2</sub>O)<sub>10</sub> [1-9] Cluster (4.46 kcal/mol),  $\Delta\alpha = 24.19$ ,  $\bar{\alpha} = 131.89$**

O 1.47824700 0.39474500 -1.52533500

H 0.54362100 0.15051800 -1.62472200  
H 1.97811200 -0.41801500 -1.68438800  
O -0.40503500 1.86003200 1.46052000  
H -0.35108700 0.97941600 1.99340700  
H 0.52181200 2.14614400 1.22317300  
S -2.15734300 0.04200200 -0.78365200  
O -1.09583300 -0.71122400 -1.42393900  
O -3.45348700 -0.07911600 -1.38510500  
O -2.25617100 -0.60024500 0.66990500  
H -3.21294300 -0.69570000 0.91937400  
O -1.75598500 1.43421400 -0.54855500  
H -0.98163500 1.69953300 0.58819500  
O 0.67259200 -2.12778800 0.21579700  
H -0.05384900 -1.74159800 -0.30127700  
H 1.15033600 -1.37338100 0.60211300  
O 2.33175500 -0.32099100 1.59657200  
H 3.15350000 -0.78422200 1.34590000  
H 2.40519100 0.58345800 1.26035700  
O -4.89213500 -0.72390400 0.86634100  
H -4.85510100 -0.47489700 -0.07118600  
H -5.34044300 -1.57105000 0.90254700  
O 4.44069900 -1.69912200 0.51971900  
H 4.81096600 -2.47770600 0.93849000  
H 3.97590100 -2.01174000 -0.27580400  
O 2.66102300 -2.25757700 -1.52235700  
H 2.61952500 -2.88132100 -2.24888400  
H 1.87536700 -2.41716300 -0.94319500  
O 2.39391000 2.86765500 -1.60917800  
H 3.22272400 2.97465800 -2.07773600  
H 2.07120100 1.95744100 -1.79646700  
O -0.18387100 -0.33890600 2.68542400  
H 0.75210100 -0.56410000 2.54515100  
H -0.69348600 -0.95697700 2.14502000  
O 2.08513600 2.47086800 0.94943000  
H 2.47498300 3.15052800 1.50264800  
H 2.28393100 2.70499400 0.00178700

**(H<sub>2</sub>SO<sub>4</sub>)(H<sub>2</sub>O)<sub>10</sub> [2-8] Cluster (3.74 kcal/mol),  $\Delta\alpha = 31.42$ ,  $\bar{\alpha} = 132.27$**

O 1.83260600 1.47501100 -0.06770200  
H 0.86087800 1.48887800 -0.12146600  
H 2.10831900 0.73040500 -0.62868900  
O 0.11429000 -1.01091300 1.78774800  
H 0.42173700 -1.17272000 0.86014500  
H 0.84111900 -0.52800800 2.21216600  
S -2.09926500 0.75028200 0.08607400  
O -0.93143900 1.51585500 -0.21843600  
O -3.36705700 1.39659100 -0.04514600  
O -2.04536200 -0.49093000 -0.84602600  
H -2.85915900 -1.09745300 -0.68706800  
O -2.02317800 0.16491100 1.49067700  
H -1.08595600 -0.31766200 1.66866100  
O 0.80469800 -1.14745300 -0.75568200  
H 1.43995300 -1.78516900 -1.14326800

H -0.00829300 -1.14057900 -1.27012900  
O -4.10924000 -1.90255600 -0.46282400  
H -4.85179800 -1.25480100 -0.49649700  
H -4.14869900 -2.32166300 0.40001400  
O -5.80035600 0.15215000 -0.47591700  
H -5.07247400 0.77619700 -0.31577200  
H -6.24981800 0.45810700 -1.26539800  
O 4.08052900 -1.59741100 1.00354800  
H 3.56033100 -0.99615300 1.56636600  
H 4.76781900 -1.96814300 1.55944700  
O 2.94418500 -2.59796300 -1.51051500  
H 3.36486200 -1.82821700 -1.91718300  
H 3.31424800 -2.59256500 -0.61762900  
O 3.92095200 0.01472600 -1.31794300  
H 4.28172400 -0.36030400 -0.50338700  
H 4.24577800 0.92644700 -1.37312400  
O 2.50767200 0.35618400 2.23041800  
H 2.29129600 0.88619700 1.42046900  
H 2.82596000 0.97145900 2.89355000  
O 4.10606700 2.79335200 -0.97673000  
H 4.07103600 3.49920700 -1.62370500  
H 3.19443300 2.64958600 -0.67844000

**(H<sub>2</sub>SO<sub>4</sub>)(H<sub>2</sub>O)<sub>10</sub> [3-7] Cluster (5.01 kcal/mol),  $\Delta\alpha = 35.66$ ,  $\bar{\alpha} = 132.05$**

O -2.07920000 -1.45025800 -0.05515600  
H -2.99606300 -1.75854100 0.12817200  
H -1.50052100 -2.19491800 -0.24137100  
O -0.75129400 0.21581600 1.58760000  
H -1.13573200 1.07017600 1.33474200  
H -1.26211100 -0.45275800 1.07303000  
S 1.73159400 -0.70465300 -0.41232600  
O 0.61443200 -1.55465200 -0.66271100  
O 3.05268900 -1.23030600 -0.53339800  
O 1.57727800 0.50051500 -1.37327900  
H 2.38302300 1.15130800 -1.28738700  
O 1.61377300 -0.08503200 0.98969400  
H 0.59125200 0.07313700 1.26181700  
O -1.35761100 0.70916400 -1.66603800  
H -1.61329800 -0.16112800 -1.31425200  
H -0.39930500 0.66563200 -1.77184800  
O 3.56181900 1.98886000 -1.04291200  
H 3.91148200 1.73250200 -0.14053900  
H 3.43772300 2.93967300 -1.04065500  
O 5.55310000 -1.19359200 0.72886100  
H 4.76164000 -1.42011900 0.21823100  
H 6.29392700 -1.29496200 0.12943400  
O -4.62582900 1.06699800 1.14748000  
H -4.85164900 1.49092100 1.97706100  
H -3.80011700 1.48920900 0.83993000  
O 4.28340900 1.16985100 1.32124100  
H 3.45910000 0.76603500 1.61792800  
H 4.89381900 0.41713900 1.20371100  
O -2.24592700 2.18312500 0.28118700

H -1.90992500 1.71544300 -0.53658500  
H -2.21585000 3.12402400 0.10028200  
O -6.19708800 -0.06694000 -0.93590600  
H -7.10749700 0.19601500 -1.07437600  
H -5.82875000 0.54574300 -0.28361900  
O -4.61862000 -1.78632300 0.63530000  
H -5.24917900 -1.61645500 -0.07836900  
H -4.61492100 -0.94141800 1.10617900

**(H<sub>2</sub>SO<sub>4</sub>)(H<sub>2</sub>O)<sub>10</sub> [4-6] Cluster (0.00 kcal/mol),  $\Delta\alpha = 33.69$ ,  $\bar{\alpha} = 130.94$**

O 3.13674900 -2.10756200 -0.45999200  
H 3.48193900 -3.00181600 -0.48525100  
H 2.19489700 -2.16611400 -0.70962400  
O 1.92216200 1.24527000 -0.50347500  
H 1.97644800 0.77481700 0.35256800  
H 2.81870900 1.06673800 -0.89311700  
S -0.57744800 -1.02875200 -0.52727100  
O 0.43605400 -2.04252100 -0.65935700  
O -1.90604900 -1.41888700 -0.94218800  
O -0.57425700 -0.44831200 0.83998400  
H -1.21623200 1.00500000 0.82753600  
O -0.22471200 0.16292700 -1.47845200  
H 0.66030400 0.55656700 -1.21075100  
O 2.17199000 -0.49900600 1.64337000  
H 2.55559000 -1.21312800 1.10754400  
H 1.22062000 -0.67851800 1.67143000  
O -1.68926900 1.86979400 0.61990400  
H -2.44115500 1.57213600 -0.11801800  
H -1.00531900 2.49258800 0.21912400  
O -3.37499700 -1.43750400 1.48715500  
H -3.01588100 -1.68857400 0.62256600  
H -2.60052000 -1.10114300 1.94709400  
O 4.34235700 0.41381000 -1.09422300  
H 4.12633700 -0.52985900 -1.07033100  
H 4.69959900 0.60012200 -0.21127000  
O -3.33552800 1.05677300 -0.98039600  
H -2.96384100 0.20513600 -1.26941300  
H -4.16085100 0.83816700 -0.48215100  
O -5.30988000 0.21993700 0.57694500  
H -5.84408100 0.71210000 1.20110900  
H -4.73146300 -0.37944100 1.09071600  
O 4.66231600 0.76386100 1.68425700  
H 3.79414400 0.46916000 1.99216900  
H 4.94620700 1.45882300 2.27906000  
O 0.20536900 3.34110000 -0.33418800  
H 0.96166500 2.72925500 -0.44102000  
H 0.08361300 3.78056600 -1.17838800

**(H<sub>2</sub>SO<sub>4</sub>)(H<sub>2</sub>O)<sub>10</sub> [5-5] Cluster (3.05 kcal/mol),  $\Delta\alpha = 38.09$ ,  $\bar{\alpha} = 132.16$**

O 3.73495700 -1.06544000 -1.53421500  
H 4.15276200 -1.74978700 -2.06021800  
H 2.76735400 -1.21931600 -1.58447300  
O 2.14095200 1.52098100 0.26153100

H 2.48479300 0.73154900 0.76364200  
 H 2.89565400 1.69475100 -0.42654200  
 S 0.03151000 -0.85739800 -0.47540200  
 O 1.14758300 -1.47557900 -1.14839200  
 O -1.26175300 -1.40119500 -0.76220900  
 O 0.34378000 -1.08488700 1.04870500  
 H -0.44160100 -0.76068200 1.62139400  
 O 0.03934800 0.62051600 -0.64730900  
 H 1.22882100 1.20224700 -0.18235000  
 O 3.18090400 -0.73016400 1.19936600  
 H 3.48949000 -1.07578400 0.34307200  
 H 2.35985400 -1.20570900 1.39292300  
 O -1.64903100 -0.21735400 2.37246200  
 H -2.42704500 -0.71347700 2.06203400  
 H -1.81331600 0.66977300 2.02081100  
 O -6.02296700 -0.34043100 -0.36726900  
 H -6.42311600 -0.67477400 -1.17101900  
 H -5.77909900 0.58821000 -0.55081700  
 O 4.17163500 1.66449200 -1.19514500  
 H 4.16717700 0.77089700 -1.57816200  
 H 4.81636900 1.61229400 -0.46870800  
 O -2.61000200 1.42219900 0.20572000  
 H -1.79152400 1.33107600 -0.30227600  
 H -2.97030600 0.51676300 0.25745600  
 O -5.06112800 2.20219900 -0.77112200  
 H -4.13392700 2.10273300 -0.48458800  
 H -5.42248500 2.92204000 -0.25189600  
 O 5.38986200 1.00084900 1.20975100  
 H 4.77346700 0.37043500 1.60402400  
 H 5.88804900 1.39137300 1.92893900  
 O -3.63352300 -1.13900900 0.67281100  
 H -4.53513300 -1.04500700 0.30968900  
 H -3.07531500 -1.55865000 0.00601500

**(H<sub>2</sub>SO<sub>4</sub>)(NH<sub>3</sub>)(H<sub>2</sub>O) [0-1] Cluster (2.21 kcal/mol),  $\Delta\alpha = 13.72$ ,  $\bar{\alpha} = 58.22$**

S -0.90772900 -0.09419400 0.08880800  
 O 0.02751800 0.14933200 1.17088200  
 O -2.28755800 -0.22107500 0.41793700  
 O -0.77413000 1.25198600 -0.78769400  
 H -1.61926900 1.41055600 -1.22290600  
 O -0.39987900 -1.15975900 -0.79280600  
 H 1.02252400 -1.36260800 -0.47229300  
 N 2.05559200 -1.33763800 -0.08790400  
 H 2.01005600 -1.58962300 0.89596400  
 H 2.35073800 -0.34114300 -0.14671700  
 H 2.68623900 -1.95389000 -0.58711600  
 O 2.22459800 1.41194900 0.08674200  
 H 1.94560200 1.96871500 -0.64421600  
 H 1.41423000 1.27908800 0.61120600

**(H<sub>2</sub>SO<sub>4</sub>)(NH<sub>3</sub>)(H<sub>2</sub>O) [1-0] Cluster (0.00 kcal/mol),  $\Delta\alpha = 20.44$ ,  $\bar{\alpha} = 58.81$**

S 0.02917100 0.43961800 -0.02590500  
 O -0.98608600 1.27473700 0.52063600

O 1.09187200 1.00801300 -0.79283000  
O 0.65097400 -0.34284800 1.17114800  
H 1.54870200 -0.67384000 0.90943700  
O -0.62270300 -0.66135900 -0.88322200  
H -1.60478600 -0.80842200 -0.57753200  
N -3.07057400 -0.78172100 -0.01247000  
H -3.80949800 -0.74359200 -0.70357000  
H -3.03955100 0.11139100 0.47200400  
H -3.30688800 -1.49927300 0.66167800  
O 3.02494000 -0.81226200 0.07679200  
H 3.19093200 -1.58097400 -0.47252500  
H 2.77639700 -0.09737500 -0.52791300

**(H<sub>2</sub>SO<sub>4</sub>)(NH<sub>3</sub>)(H<sub>2</sub>O)<sub>2</sub> [0-2] Cluster (2.82 kcal/mol),  $\Delta\alpha = 16.32$ ,  $\bar{\alpha} = 67.81$**

S 1.28459600 0.08990600 0.02405600  
O 0.35532300 -0.04860800 1.13581000  
O 2.67375400 0.12576100 0.34351800  
O 1.06246600 -1.28334800 -0.79573300  
H 1.91647800 -1.54753000 -1.15547400  
O 0.83793300 1.14637200 -0.88737300  
H -0.51460500 1.69833800 -0.36280500  
N -1.39582400 1.91194600 0.21555800  
H -1.67842100 2.88286400 0.14763600  
H -1.12628300 1.67609600 1.17032000  
H -2.16823400 1.26465200 -0.07268700  
O -1.54732200 -1.94078100 0.39735600  
H -0.89568800 -1.39608800 0.87322200  
H -1.02172800 -2.31097900 -0.31766200  
O -3.23945600 -0.00889000 -0.31355700  
H -3.73379200 -0.20194700 -1.11117300  
H -2.70208900 -0.81158100 -0.10533500

**(H<sub>2</sub>SO<sub>4</sub>)(NH<sub>3</sub>)(H<sub>2</sub>O)<sub>2</sub> [1-1] Cluster (2.15 kcal/mol),  $\Delta\alpha = 21.95$ ,  $\bar{\alpha} = 68.07$**

S -0.32850500 -0.43337000 0.23164600  
O 0.67243900 -0.16081600 1.24585600  
O -1.55216400 -1.03267600 0.68743900  
O -0.69903800 1.00166600 -0.33280400  
H -1.66703400 1.04038300 -0.52209900  
O 0.27813400 -1.15190400 -0.90215000  
H 1.73150300 -1.00479900 -0.79376000  
N 2.77380200 -0.74676500 -0.53195800  
H 3.45389400 -1.06312300 -1.21308800  
H 2.95883200 -1.15575100 0.38011800  
H 2.77810900 0.28836500 -0.42260900  
O 2.20485400 1.87371300 0.14897500  
H 1.61380000 2.35047900 -0.44006100  
H 1.59997700 1.42954800 0.76906300  
O -3.34923400 0.63400000 -0.55758000  
H -3.95309000 1.12927500 -0.00128900  
H -3.11645800 -0.16495900 -0.05680300

**(H<sub>2</sub>SO<sub>4</sub>)(NH<sub>3</sub>)(H<sub>2</sub>O)<sub>2</sub> [2-0] Cluster (0.00 kcal/mol),  $\Delta\alpha = 23.21$ ,  $\bar{\alpha} = 68.92$**

S 0.40063700 -0.49094600 0.19687700

O 1.51662000 -1.15796800 0.77844200  
O -0.71581300 -1.26782300 -0.24729300  
O -0.07755000 0.56046400 1.22094900  
H -0.90684800 1.04529100 0.88460800  
O 0.87017000 0.35044300 -1.00975400  
H 1.87055100 0.59365600 -0.89051200  
N 3.40338900 0.73230600 -0.53097600  
H 4.05247800 0.50097100 -1.27276300  
H 3.45627300 0.00493000 0.17745900  
H 3.70156200 1.60470900 -0.11251600  
O -2.17599900 1.70953300 0.31673200  
H -2.73714100 0.98270800 -0.03847200  
H -2.00376900 2.30084800 -0.41917100  
O -3.32292900 -0.48686300 -0.67881300  
H -3.95332200 -1.01740500 -0.18894300  
H -2.46968100 -0.94900300 -0.61500200

**(H<sub>2</sub>SO<sub>4</sub>)(NH<sub>3</sub>)(H<sub>2</sub>O)<sub>3</sub> [0-3] Cluster (2.27 kcal/mol),  $\Delta\alpha = 13.27$ ,  $\bar{\alpha} = 76.56$**

S 1.43386000 0.10339100 -0.05804900  
O 0.85058400 0.83921200 1.07119400  
O 2.82150700 0.34747800 -0.27361000  
O 1.29822000 -1.44421800 0.35159000  
H 2.12076500 -1.71950800 0.77255900  
O 0.56427700 0.19345000 -1.22316200  
H -0.67574300 2.12068200 -1.15140400  
N -1.10281400 2.17322700 -0.22798300  
H -0.37459700 1.79095000 0.42764100  
H -1.94550800 1.50861900 -0.20329100  
H -1.36481300 3.12478800 0.00359900  
O -1.41639600 -0.93130300 1.69098100  
H -1.21557800 -1.54497800 0.97206500  
H -0.59934000 -0.42569700 1.79687400  
O -1.50654500 -1.62811600 -1.19844800  
H -1.38915100 -2.41221300 -1.73655300  
H -0.70647300 -1.08529600 -1.32508700  
O -3.05090100 0.38677400 -0.04971900  
H -2.68112000 -0.04774000 0.74651500  
H -2.87646900 -0.28267600 -0.72886900

**(H<sub>2</sub>SO<sub>4</sub>)(NH<sub>3</sub>)(H<sub>2</sub>O)<sub>3</sub> [1-2] Cluster (0.00 kcal/mol),  $\Delta\alpha = 17.31$ ,  $\bar{\alpha} = 77.08$**

S 0.81707800 -0.21269300 -0.47209000  
O -0.35299100 -0.13195200 -1.32923900  
O 2.07829600 -0.37890500 -1.13256100  
O 0.84349400 1.21095000 0.23922900  
H 1.66984200 1.24182800 0.77021200  
O 0.61071600 -1.18202400 0.61735200  
H -0.86561700 -1.69769400 0.50621000  
N -1.86812000 -1.89662800 0.18162700  
H -2.50722900 -1.15036100 0.54914000  
H -2.18594700 -2.82277300 0.44293400  
H -1.82624100 -1.79591000 -0.83209700  
O -1.89227800 2.00835800 -0.41334800  
H -1.42479100 1.37305900 -0.98217800



H -1.17430800 2.35953100 0.12242900  
O -3.41375000 0.22487000 0.83300800  
H -3.82180100 0.54645900 1.63745700  
H -2.91074500 0.97921800 0.43599900  
O 3.22266500 0.47401400 1.35422800  
H 2.88392200 -0.29695600 1.81992600  
H 3.39727500 0.14057800 0.46266500

**(H<sub>2</sub>SO<sub>4</sub>)(NH<sub>3</sub>)(H<sub>2</sub>O)<sub>3</sub> [2-1] Cluster (1.18 kcal/mol),  $\Delta\alpha = 20.27$ ,  $\bar{\alpha} = 77.56$**

S 0.00662800 -0.58496300 -0.09006100  
O -1.20693300 -1.20835900 -0.57873600  
O 1.20022100 -1.37732900 -0.19635200  
O 0.17056000 0.68822600 -0.99914300  
H 0.90013500 1.24905900 -0.59800400  
O -0.18635500 -0.05217700 1.28021400  
H -1.67283700 0.05969800 1.47394900  
N -2.76237400 0.05068700 1.38037000  
H -2.97365000 0.52336200 0.47252300  
H -3.23785300 0.48827200 2.16103900  
H -3.04038800 -0.92319600 1.28932400  
O 2.02427800 1.85894800 0.41270700  
H 1.63419300 1.56792200 1.24423400  
H 2.79047300 1.26624500 0.27600400  
O 3.70323800 -0.20425600 -0.15887400  
H 4.32613900 -0.66949400 0.40057100  
H 2.91427300 -0.77175500 -0.21879100  
O -2.91591600 0.85832000 -1.23670500  
H -2.32153300 0.09749400 -1.36592300  
H -2.40114400 1.60999900 -1.54142700

**(H<sub>2</sub>SO<sub>4</sub>)(NH<sub>3</sub>)(H<sub>2</sub>O)<sub>3</sub> [3-0] Cluster (0.42 kcal/mol),  $\Delta\alpha = 23.83$ ,  $\bar{\alpha} = 78.50$**

S 0.52803900 -0.63272000 -0.10397700  
O 1.57606200 -1.59638600 -0.02689900  
O -0.54953800 -0.84121800 -1.02406700  
O -0.02480800 -0.41027600 1.29971300  
H -0.96251700 0.10402700 1.28679100  
O 1.15635900 0.74141900 -0.49370600  
H 2.16117600 0.75616500 -0.22164500  
N 3.64918500 0.49438300 0.18544700  
H 4.35037100 0.71586100 -0.51055500  
H 3.59749100 -0.51724300 0.27678100  
H 3.95327800 0.87707900 1.07227900  
O -2.18330400 0.77653200 1.18461200  
H -2.77099300 0.15813900 0.70476400  
H -1.99816200 1.51262700 0.57061900  
O -3.26175500 -1.13202900 -0.41806100  
H -3.52259500 -2.00686900 -0.12628700  
H -2.36884400 -1.22404800 -0.78651400  
O -1.12289800 2.55978600 -0.61506100  
H -0.31171900 2.06482300 -0.79418000  
H -0.84134800 3.43965500 -0.35878800

**(H<sub>2</sub>SO<sub>4</sub>)(NH<sub>3</sub>)(H<sub>2</sub>O)<sub>4</sub> [0-4] Cluster (6.88 kcal/mol),  $\Delta\alpha = 14.32$ ,  $\bar{\alpha} = 87.42$**

S -1.73231200 -0.18858900 -0.21231900  
O -0.51690400 -0.14642400 -0.99684900  
O -2.94035500 -0.55749400 -0.84660600  
O -1.51239900 -1.19216200 0.95571900  
H -0.61928100 -1.04889700 1.36231400  
O -1.86792500 1.16108100 0.49314400  
H -1.09750900 1.83970600 0.17658000  
N -0.00093800 2.66590900 -0.35037300  
H 0.87207600 2.34501300 0.06688200  
H -0.07299700 3.67063400 -0.25199500  
H 0.03520800 2.43549600 -1.33751800  
O 1.51980300 -2.04090400 -0.75263500  
H 1.45346000 -2.17730700 0.19839500  
H 0.72921600 -1.51770800 -0.96780600  
O 0.94860700 -0.87705000 1.89105700  
H 1.07472600 -0.89944000 2.84170600  
H 1.43760200 -0.09568100 1.55594800  
O 2.37456000 1.20735000 0.82111900  
H 3.08593200 1.56704600 1.35489200  
H 2.81404000 0.74966300 0.05727600  
O 3.45151600 -0.24457300 -1.08344300  
H 3.55665300 -0.00500600 -2.00509800  
H 2.79920100 -0.98605600 -1.05390700

**(H<sub>2</sub>SO<sub>4</sub>)(NH<sub>3</sub>)(H<sub>2</sub>O)<sub>4</sub> [1-3] Cluster (0.00 kcal/mol),  $\Delta\alpha = 14.68$ ,  $\bar{\alpha} = 86.81$**

S 0.82933300 -0.58244000 -0.07566700  
O 0.27458400 -1.83015700 0.37756000  
O 1.24177500 0.31961600 1.00838700  
O 2.13484800 -0.95812800 -0.84887700  
H 2.79184900 -0.22709000 -0.77507900  
O -0.04733500 0.11968100 -1.01277800  
H -1.59933100 1.73631900 0.85567600  
N -1.32096900 1.17973000 1.69455800  
H -0.29788600 1.01613000 1.64005100  
H -1.78664500 0.22846400 1.60939900  
H -1.57794700 1.64555100 2.55702400  
O -2.65520800 -0.40953200 -1.45861200  
H -1.67636400 -0.39672000 -1.43151400  
H -2.90375700 -0.89390400 -2.24786600  
O -1.84886200 2.27275500 -0.78550200  
H -1.01290400 1.89113500 -1.09252200  
H -2.50028300 1.65754400 -1.14934200  
O 3.64181000 1.14559300 -0.10137200  
H 2.96528900 1.15147600 0.59343300  
H 4.47591600 0.95914500 0.33366600  
O -2.32789900 -1.26482000 1.20906700  
H -2.72549700 -1.15267000 0.33164000  
H -1.48470100 -1.71451400 1.02122400

**(H<sub>2</sub>SO<sub>4</sub>)(NH<sub>3</sub>)(H<sub>2</sub>O)<sub>4</sub> [2-2] Cluster (0.61 kcal/mol),  $\Delta\alpha = 19.76$ ,  $\bar{\alpha} = 86.85$**

S 0.33465200 -0.57220200 -0.42784500  
O -0.97803500 -0.94919700 -0.90571000  
O 1.44243500 -1.27716700 -1.00808000

O 0.44188200 0.94412500 -0.86556600  
H 1.34812400 1.30454400 -0.61361700  
O 0.39780900 -0.55229400 1.04678800  
H -0.95764500 0.02907000 1.62225500  
N -1.91328400 0.47407600 1.80419300  
H -1.96756700 0.89303800 2.72510400  
H -2.64473000 -0.22806200 1.66281100  
H -2.06161300 1.17851800 1.03953300  
O 3.32791500 -0.69739700 1.00540300  
H 2.57626400 -0.73819800 1.60810600  
H 2.97812900 -1.16402100 0.23044600  
O 2.79652400 1.70989500 -0.09176000  
H 3.43188900 1.91828900 -0.77941000  
H 3.12452500 0.89192400 0.34999500  
O -2.27491600 1.84924600 -0.51716700  
H -2.84696700 1.16808900 -0.89080400  
H -1.40363900 1.68837400 -0.90991000  
O -3.50336000 -0.84251400 -0.04619900  
H -2.62978400 -1.05992300 -0.42888800  
H -4.11047200 -1.52249800 -0.34112000

**(H<sub>2</sub>SO<sub>4</sub>)(NH<sub>3</sub>)(H<sub>2</sub>O)<sub>4</sub> [3-1] Cluster (1.73 kcal/mol),  $\Delta\alpha = 22.03$ ,  $\bar{\alpha} = 86.97$**

S 0.31644400 -0.25602200 -0.60335600  
O 1.58406000 -0.63032900 -1.19597500  
O -0.85368700 -0.53548500 -1.39414100  
O 0.24030500 -1.09960500 0.70685100  
H -0.66678600 -0.96305700 1.16487300  
O 0.34976200 1.16493300 -0.17186400  
H 1.82720800 1.53579800 -0.02729500  
N 2.91112000 1.53337800 -0.00051500  
H 3.30340600 2.37161000 0.41274300  
H 3.22889700 1.41993600 -0.95979500  
H 3.17755000 0.66701500 0.52542300  
O -2.03046900 -0.64930700 1.76358800  
H -2.70700400 -0.99897100 1.16672700  
H -2.13088400 0.31735300 1.64157100  
O -3.47111700 -0.43386400 -0.65475500  
H -4.09763700 -0.75705900 -1.30357300  
H -2.58459000 -0.53074000 -1.05022300  
O 3.25519500 -0.99124400 0.99024800  
H 2.68746400 -1.24439300 1.72377600  
H 2.74052300 -1.25010000 0.20575800  
O -2.30846200 1.86360300 0.68627200  
H -2.90588500 1.44754300 0.05176500  
H -1.43790100 1.83815800 0.26375200

**(H<sub>2</sub>SO<sub>4</sub>)(NH<sub>3</sub>)(H<sub>2</sub>O)<sub>4</sub> [4-1] Cluster (2.43 kcal/mol),  $\Delta\alpha = 26.39$ ,  $\bar{\alpha} = 87.86$**

S 0.89528300 -0.47431800 -0.26660000  
O 1.97330100 -1.14567500 -0.91476500  
O -0.26141800 -0.12829700 -1.06173300  
O 0.45506200 -1.28252800 0.93619200  
H -0.59056800 -1.15450700 1.21199900  
O 1.41802300 0.86288900 0.31172300

H 2.45507100 0.81408400 0.42844300  
N 3.98522800 0.54813900 0.44157100  
H 4.56781000 1.26287600 0.02330400  
H 4.01172700 -0.27595700 -0.15337900  
H 4.38327300 0.30293000 1.33989600  
O -1.89943900 -1.07409100 1.52261000  
H -2.37682400 -1.58426600 0.85296500  
H -2.24499000 -0.15177100 1.37077800  
O -2.88510600 -1.07708600 -1.08578900  
H -3.18492400 -1.51444400 -1.88408600  
H -1.96282000 -0.81594500 -1.24447000  
O -0.92426300 2.60946300 -0.48528600  
H -0.63361500 1.79276700 -0.91532900  
H -0.19642900 2.81759800 0.10579500  
O -2.97338600 1.19413400 0.73874500  
H -3.35188800 0.76455800 -0.03778600  
H -2.31915300 1.82371900 0.38289500

**(H<sub>2</sub>SO<sub>4</sub>)(NH<sub>3</sub>)(H<sub>2</sub>O)<sub>5</sub> [0-5] Cluster (3.75 kcal/mol),  $\Delta\alpha = 9.81$ ,  $\bar{\alpha} = 97.06$**

S 1.74890900 0.02804200 -0.59427600  
O 1.65553000 1.34819900 -0.01663600  
O 2.53166100 -0.09631400 -1.77981200  
O 2.48843300 -0.88076800 0.51577200  
H 3.35757600 -1.10934400 0.16842500  
O 0.41934900 -0.60195100 -0.65533300  
H -0.70144700 0.57061100 0.15589200  
N -1.43147800 1.07830000 0.68792200  
H -1.95747400 0.36601800 1.20484000  
H -2.06466000 1.53464400 0.00970300  
H -0.96443500 1.75238400 1.31384900  
O 0.00812300 -2.60035900 1.21934700  
H 0.29187900 -2.03783300 0.47729400  
H 0.72754100 -2.54091300 1.85139700  
O -2.28930000 -0.98271200 -1.48376100  
H -2.46164300 -1.35500100 -0.60740600  
H -1.32754100 -0.99486700 -1.57314000  
O -2.41971400 -1.52132400 1.36626900  
H -3.09687100 -2.04399500 1.79833300  
H -1.56904700 -2.00746800 1.46295100  
O -3.26225500 1.55277200 -1.34263400  
H -3.31195100 2.08071600 -2.14037400  
H -3.01796100 0.64528500 -1.61202000  
O 0.39772200 2.76175800 1.93645300  
H 1.05529000 2.35807200 1.34287400  
H 0.84215700 2.95051100 2.76304400

**(H<sub>2</sub>SO<sub>4</sub>)(NH<sub>3</sub>)(H<sub>2</sub>O)<sub>5</sub> [1-4] Cluster (1.76 kcal/mol),  $\Delta\alpha = 20.57$ ,  $\bar{\alpha} = 96.88$**

S -0.89788800 -0.34143500 -0.43252400  
O 0.15399200 -0.78254400 0.47752900  
O -1.69112700 -1.40496000 -0.98882900  
O -1.86236700 0.54758900 0.45678800  
H -2.69184200 0.04602700 0.64708800  
O -0.36966000 0.60526400 -1.41138900

H 1.34410200 0.95212900 -0.93296600  
N 2.14816600 1.24906800 -0.35272600  
H 2.50410700 2.13240900 -0.70328800  
H 2.87898800 0.50790200 -0.34830000  
H 1.74875500 1.39993600 0.60423300  
O 0.68127200 1.70821800 1.92828600  
H 0.12597500 2.32824200 1.43307100  
H 0.19560000 0.87383400 1.90671000  
O -0.08569900 3.16023300 -0.38730600  
H -0.69346000 3.88002100 -0.56311200  
H -0.45139400 2.37893800 -0.83618300  
O -3.91923600 -1.16334600 0.59245600  
H -4.76071900 -0.95280800 0.18402900  
H -3.38925100 -1.60846400 -0.08886900  
O 2.09611300 -2.68730800 0.48493600  
H 1.29261800 -2.13407800 0.45869600  
H 2.08144000 -3.13544500 1.33174200  
O 3.92086300 -0.87330600 -0.24855700  
H 4.41192800 -1.22265600 -0.99367800  
H 3.33899300 -1.60522100 0.05899600

**(H<sub>2</sub>SO<sub>4</sub>)(NH<sub>3</sub>)(H<sub>2</sub>O)<sub>5</sub> [2-3] Cluster (1.88 kcal/mol),  $\Delta\alpha = 17.20$ ,  $\bar{\alpha} = 96.85$**

S 0.56826400 -0.32366100 -0.47288900  
O -0.76307600 -0.28541800 -1.07480200  
O 1.50930900 -1.19869900 -1.10784700  
O 1.09179500 1.14542100 -0.63290300  
H 2.10464500 1.12064100 -0.61133400  
O 0.45430700 -0.56211000 0.97926600  
H -2.45317600 -1.53609300 0.74823700  
N -2.18480700 -0.85328000 1.47932700  
H -1.14503700 -0.71662500 1.39380300  
H -2.42317200 -1.20156100 2.40120100  
H -2.65908200 0.06368800 1.30496000  
O -1.59560900 2.37872800 -0.95212800  
H -1.36062000 1.47907800 -1.23494000  
H -0.74250500 2.76678300 -0.73818300  
O 3.06145600 -0.24136700 2.00761800  
H 3.01468800 0.36349400 2.74971600  
H 2.13923800 -0.44887600 1.77781200  
O 3.63075800 0.72491100 -0.51006500  
H 3.58266400 -0.08556500 -1.03114900  
H 3.65380500 0.41174000 0.41494600  
O -2.52324000 -2.35641500 -0.84565700  
H -2.26180300 -3.23943200 -1.11104900  
H -1.84805400 -1.75128000 -1.20133600  
O -3.20100200 1.64720100 1.03868000  
H -4.09778700 1.88413500 0.79722700  
H -2.61996700 2.02338700 0.33373300

**(H<sub>2</sub>SO<sub>4</sub>)(NH<sub>3</sub>)(H<sub>2</sub>O)<sub>5</sub> [3-2] Cluster (0.00 kcal/mol),  $\Delta\alpha = 20.79$ ,  $\bar{\alpha} = 96.57$**

S -0.04969700 -0.22994000 -0.49215100  
O -1.35964000 -0.36284400 -1.11393200  
O 0.99503500 -1.00214700 -1.11481500

O 0.28422200 1.28440900 -0.66579800  
H 1.23915600 1.47376900 -0.33730400  
O -0.12605000 -0.47619800 0.95927800  
H -1.61169200 -0.02125500 1.50917500  
N -2.62647700 0.26643600 1.56170400  
H -2.91127300 0.49708200 2.50634200  
H -3.16972000 -0.52623300 1.17732100  
H -2.72746000 1.08184600 0.91745600  
O 2.64154700 1.63369400 0.20768400  
H 3.24448300 1.14571400 -0.37083500  
H 2.64758000 1.08363100 1.01855900  
O 3.68182800 -0.83181100 -0.67444900  
H 4.23225000 -1.34180800 -1.27012500  
H 2.75774400 -0.99228500 -0.94216700  
O -2.56012500 2.11547900 -0.49355500  
H -1.76084500 2.64962500 -0.44695600  
H -2.28608000 1.37673900 -1.06081900  
O 2.55905200 -0.45590900 1.98239700  
H 3.09329600 -0.94072700 1.34078000  
H 1.64240200 -0.67972900 1.76435500  
O -3.48707700 -1.75321000 -0.10125200  
H -2.71186400 -1.49396600 -0.63069400  
H -3.52782400 -2.71012300 -0.11706600

**(H<sub>2</sub>SO<sub>4</sub>)(NH<sub>3</sub>)(H<sub>2</sub>O)<sub>5</sub> [4-1] Cluster (4.45 kcal/mol),  $\Delta\alpha = 20.27$ ,  $\bar{\alpha} = 96.24$**

S 0.48665500 -0.68060000 -0.46711000  
O 1.65684300 -1.47033200 -0.74634500  
O -0.76553600 -1.18532100 -0.99297700  
O 0.37284900 -0.68828200 1.10011300  
H -0.44664900 -0.13282500 1.40830200  
O 0.69354400 0.73732700 -0.84533300  
H 2.24507900 0.87268700 -0.99284000  
N 3.30481900 0.70605400 -0.91383900  
H 3.87183100 1.44496600 -1.31053700  
H 3.46376900 -0.19170000 -1.36898700  
H 3.47923700 0.58583900 0.10646500  
O -1.66525200 0.61858000 1.77847400  
H -1.51272300 1.44925000 1.27292700  
H -2.38914400 0.16629000 1.31755500  
O -3.07451000 -1.56617600 0.53929500  
H -3.02327300 -2.20582500 1.25539300  
H -2.22812400 -1.66702500 0.06656500  
O 3.01068400 0.16327800 1.72587200  
H 3.22741400 0.29813600 2.64851900  
H 2.08882800 -0.13898100 1.68458200  
O -2.82545500 0.74274900 -1.19636400  
H -3.59171000 0.19776200 -1.01029600  
H -2.10724500 0.11216300 -1.35372000  
O -1.34937200 2.71665200 0.01055400  
H -0.48335800 2.40505900 -0.27467000  
H -1.94448900 2.20364300 -0.56492500

**(H<sub>2</sub>SO<sub>4</sub>)(NH<sub>3</sub>)(H<sub>2</sub>O)<sub>5</sub> [5-0] Cluster (5.22 kcal/mol),  $\Delta\alpha = 22.75$ ,  $\bar{\alpha} = 97.78$**

S 1.29484900 -0.58631100 -0.26723200  
O 2.58067100 -0.94010200 -0.77006800  
O 0.13439100 -1.06572000 -0.98125700  
O 1.19739900 -0.98714300 1.18707500  
H 0.17280000 -0.85814900 1.61020800  
O 1.16979100 0.96462600 -0.27071800  
H 2.12459800 1.38586200 -0.17629000  
N 3.62034900 1.77058700 -0.11437000  
H 3.97294900 2.01344800 0.80344400  
H 3.92422000 2.48193600 -0.76773900  
H 4.03423700 0.88382400 -0.39043800  
O -1.04377800 -0.67188700 2.05164300  
H -1.62264900 -1.25463300 1.53213800  
H -1.25756300 0.27347300 1.80771600  
O -2.02910100 -2.38132800 0.07291800  
H -2.15052600 -3.33178800 0.10384400  
H -1.17286300 -2.21344200 -0.35658400  
O -1.22166500 1.79580500 1.24406500  
H -0.47641400 1.78163700 0.63215900  
H -1.99984600 2.06454100 0.71708900  
O -2.49594800 -0.07825300 -1.61871600  
H -2.79135600 -0.87167300 -1.15709900  
H -1.53287200 -0.15684600 -1.59822700  
O -3.36600900 2.17626400 -0.38530500  
H -3.55366100 2.89391700 -0.99093400  
H -3.13709200 1.39667900 -0.93007000

**(H<sub>2</sub>SO<sub>4</sub>)(NH<sub>3</sub>)(H<sub>2</sub>O)<sub>6</sub> [0-6] Cluster (10.94 kcal/mol),  $\Delta\alpha = 20.88$ ,  $\bar{\alpha} = 105.67$**

S -2.45911400 -0.78886000 -0.19152300  
O -1.29893300 -1.62601600 0.03578000  
O -3.72139900 -1.45210600 -0.18202100  
O -2.49802000 0.24258300 1.06601700  
H -3.03289300 -0.15640500 1.76140600  
O -2.23079000 0.13945500 -1.30003400  
H -0.48324300 0.17532200 -1.56011900  
N 0.50861100 0.31643500 -1.28108200  
H 1.18184900 0.03025800 -1.98559400  
H 0.67632100 -0.25156500 -0.43435100  
H 0.65491100 1.30429800 -1.03971000  
O 1.19574500 -1.19013800 1.16412700  
H 0.87554900 -0.39106300 1.63057700  
H 0.38980400 -1.69616900 0.98418800  
O 0.20116200 1.23913100 1.86925900  
H -0.69277600 1.27146200 1.50568200  
H 0.72535400 1.84253500 1.32554400  
O 2.18042600 2.20481000 0.00724800  
H 2.72751100 2.99029200 -0.02221400  
H 2.76874900 1.43054700 -0.09171900  
O 3.20530800 -0.27277600 -0.45044800  
H 2.67460400 -0.78543700 0.18490200  
H 4.10856900 -0.61698700 -0.40382300  
O -1.07092200 2.52294300 -0.54818600  
H -1.50566500 3.35111200 -0.34229400

H -1.77179800 1.89059100 -0.77672900  
O 5.83040800 -1.34748900 -0.24106400  
H 6.00246800 -2.15994800 -0.72192200  
H 6.14234600 -1.50530800 0.65269800

**(H<sub>2</sub>SO<sub>4</sub>)(NH<sub>3</sub>)(H<sub>2</sub>O)<sub>6</sub> [1-5] Cluster (3.99 kcal/mol),  $\Delta\alpha = 19.71$ ,  $\bar{\alpha} = 106.31$**

S 1.66200800 0.04267600 0.01784500  
O 0.51964600 0.82043100 0.49543600  
O 2.84203600 0.81664000 -0.24335500  
O 1.96542700 -0.91480700 1.23807400  
H 2.75778500 -1.43643200 0.98992800  
O 1.27909100 -0.83058100 -1.09328300  
H -0.38393700 -0.79623400 -1.22012200  
N -1.41660600 -0.69912900 -1.05869100  
H -1.99550300 -1.16638100 -1.75480400  
H -1.67098900 0.29968200 -1.00697300  
H -1.65075000 -1.12816400 -0.15444200  
O -2.75801800 -1.69045200 1.33100300  
H -2.53024600 -0.79872700 1.69215100  
H -2.50322100 -2.33661500 1.99113300  
O -3.90829500 -1.91435100 -1.20688500  
H -4.75866600 -2.31072400 -1.39792500  
H -3.78804900 -1.95741300 -0.24610400  
O 4.08536000 -1.81580400 -0.27573200  
H 3.50266100 -2.03869100 -1.00964900  
H 4.26168900 -0.87519800 -0.41034700  
O 0.03139500 3.34877700 -0.40007600  
H 0.47442700 2.55222800 -0.05560300  
H 0.26553900 4.06635400 0.19016400  
O -2.26303200 2.03905800 -0.65404000  
H -2.93959400 2.49279000 -1.15907400  
H -1.48838200 2.64701200 -0.59451500  
O -1.91546400 0.75606200 1.86343900  
H -0.96857800 0.73815300 1.64860000  
H -2.28523100 1.33967200 1.18625400

**(H<sub>2</sub>SO<sub>4</sub>)(NH<sub>3</sub>)(H<sub>2</sub>O)<sub>6</sub> [2-4] Cluster (0.00 kcal/mol),  $\Delta\alpha = 19.92$ ,  $\bar{\alpha} = 105.87$**

S 0.72531800 0.32046000 -0.16700100  
O -0.66170900 0.67107700 -0.46623100  
O 1.21351000 -0.78105400 -0.98349300  
O 1.52502200 1.59399400 -0.53901100  
H 2.51817600 1.43856600 -0.43246500  
O 0.91189100 0.06890300 1.25966200  
H -0.71645300 -0.64815800 1.81150000  
N -1.56186100 -1.22553000 1.68194300  
H -1.77522000 -1.75245100 2.52132400  
H -1.34926700 -1.86819300 0.87741200  
H -2.38094000 -0.61816300 1.39719800  
O -3.66303800 0.19787000 0.76069300  
H -3.42136000 1.14119800 0.74468500  
H -3.62919500 -0.07369500 -0.16889700  
O -2.43239300 2.61947800 0.34724900  
H -2.14790500 3.41674300 0.79490700



H -1.62923000 2.14633800 0.07559300  
O 3.39924800 -1.35291800 0.80272700  
H 2.76714100 -1.01011100 1.44782100  
H 2.81941600 -1.56113900 0.05664300  
O -2.62217500 -0.64983700 -1.76653500  
H -1.85982300 -0.10315900 -1.49141500  
H -2.84811900 -0.38312000 -2.65936400  
O 4.03547500 1.07061000 -0.21519800  
H 3.99212700 0.16849800 0.17356200  
H 4.54788700 0.99585600 -1.02262700  
O -0.93890100 -2.61376700 -0.59569300  
H -1.59081300 -2.24352500 -1.20842500  
H -0.10392300 -2.18898300 -0.85240200

**(H<sub>2</sub>SO<sub>4</sub>)(NH<sub>3</sub>)(H<sub>2</sub>O)<sub>6</sub> [3-3] Cluster (2.95 kcal/mol),  $\Delta\alpha = 19.99$ ,  $\bar{\alpha} = 105.48$**

S 0.04398500 -0.65895500 -0.32006400  
O -1.24753500 -1.15446600 -0.74700000  
O 1.09831100 -1.64209300 -0.27719600  
O 0.40611400 0.41173600 -1.39623400  
H 1.34381700 0.78052200 -1.22327800  
O -0.06190900 0.07685000 0.96070700  
H -1.85501900 0.32536900 1.28909900  
N -2.84773500 0.46569800 1.03584900  
H -3.29665500 1.10255900 1.68442000  
H -3.30214700 -0.46167800 1.01326400  
H -2.82250200 0.88134000 0.06294100  
O -2.41270200 1.56559800 -1.39462200  
H -1.73929000 2.16741100 -1.03982700  
H -1.90944500 0.87130400 -1.83735600  
O -0.82849900 2.71792200 0.59634000  
H -0.22811700 3.45971500 0.68823800  
H -0.29996500 1.91583000 0.74038900  
O 3.79027200 -1.24776400 -0.07012300  
H 4.33164400 -2.02464200 -0.21552500  
H 2.86354200 -1.52771700 -0.19041600  
O -3.45262600 -2.18503200 0.48303300  
H -2.62371400 -2.13074200 -0.02268100  
H -3.46640100 -3.04454700 0.90509100  
O 2.73796800 1.26582900 -0.81141300  
H 2.73100400 1.25078300 0.16885100  
H 3.36340000 0.55803900 -1.01881400  
O 2.62513800 0.57816400 1.83999300  
H 3.18455100 -0.17424200 1.60640500  
H 1.71943700 0.24014600 1.79139500

**(H<sub>2</sub>SO<sub>4</sub>)(NH<sub>3</sub>)(H<sub>2</sub>O)<sub>6</sub> [4-2] Cluster (0.26 kcal/mol),  $\Delta\alpha = 24.65$ ,  $\bar{\alpha} = 106.34$**

S 0.20137200 -0.56594100 -0.11875400  
O 1.40935200 -1.35935600 -0.07929900  
O -1.02378900 -1.33466600 -0.20938800  
O 0.18767800 0.19261900 1.23772600  
H -0.72484700 0.73421500 1.38131600  
O 0.26606700 0.46463700 -1.17415200  
H 1.77166200 1.08786200 -1.18467000

N 2.76793100 1.38264600 -0.97319600  
H 2.97166600 2.30626100 -1.33728500  
H 3.41601200 0.68009500 -1.33929000  
H 2.87740200 1.33439400 0.07545900  
O -1.94847900 1.39088600 1.51134700  
H -2.59527600 0.66678400 1.64156400  
H -2.14105400 1.74268500 0.61424200  
O -3.37926800 -0.94880700 1.45486200  
H -3.84378800 -0.88420900 0.61084600  
H -2.55990500 -1.39873600 1.20984400  
O 2.96140700 0.76463000 1.64935700  
H 2.04497500 0.49086200 1.81091300  
H 3.44810700 -0.05369300 1.49380900  
O -2.20705700 1.91727800 -1.14627200  
H -2.82747600 1.22591900 -1.41751300  
H -1.34043400 1.53338400 -1.34600000  
O 4.03856100 -1.03198800 -0.45893700  
H 3.11474000 -1.33986600 -0.37651800  
H 4.56983000 -1.80353700 -0.66057500  
O -3.38365400 -0.65562400 -1.42416700  
H -3.64925500 -1.17423900 -2.18528300  
H -2.49637600 -0.96850400 -1.16703700

**(H<sub>2</sub>SO<sub>4</sub>)(NH<sub>3</sub>)(H<sub>2</sub>O)<sub>6</sub> [5-1] Cluster (5.40 kcal/mol),  $\Delta\alpha = 18.21$ ,  $\bar{\alpha} = 106.41$**

S 0.42563900 -1.20712900 -0.30220900  
O -0.34637900 -2.36175400 -0.68955900  
O 1.73157500 -1.11286000 -0.89330200  
O -0.43753300 0.01629600 -0.83657300  
H -0.03390400 0.87246200 -0.49052300  
O 0.45204100 -0.99807400 1.15828400  
H -1.07139600 -0.54826300 1.60157800  
N -2.09801500 -0.29773600 1.64164000  
H -2.22746000 0.66490900 1.29027000  
H -2.45217300 -0.38452000 2.58788700  
H -2.58583200 -0.97400200 1.00629800  
O 0.53267000 2.23981300 0.10046600  
H -2.09461900 2.36314100 -0.38948000  
H 1.30666700 1.93509700 0.65292300  
O 4.15397800 0.11838500 -0.31504500  
H 4.83636600 -0.53276100 -0.14621700  
H 3.38546100 -0.38051500 -0.63863900  
O -2.94887000 -2.25915200 -0.03715900  
H -2.03576100 -2.42625500 -0.36029700  
H -3.50205100 -2.20315900 -0.81778500  
O 2.38120500 1.10245900 1.55451600  
H 3.16709100 0.87815800 1.02398100  
H 1.89752100 0.26584800 1.62424900  
O -2.30628600 2.33554600 0.57197000  
H -2.99526600 2.98695300 0.71564100  
H -0.13116200 2.58646300 0.70610100  
O -1.42933000 2.42807200 -1.98734200  
H -1.31885100 1.51164800 -2.26517000  
H -0.53332100 2.71315400 -1.76699400

**(H<sub>2</sub>SO<sub>4</sub>)(NH<sub>3</sub>)(H<sub>2</sub>O)<sub>6</sub> [6-0] Cluster (3.32 kcal/mol),  $\Delta\alpha = 20.62$ ,  $\bar{\alpha} = 106.81$**

S 1.26222500 -0.43044600 -0.38670400  
O 2.20822000 -0.64496400 -1.44200400  
O -0.10643800 -0.13808300 -0.84722000  
O 1.25955800 -1.45709100 0.63900000  
H -0.24499400 -1.77797400 1.38582800  
O 1.67046600 0.92453500 0.32531000  
H 2.68290700 0.89238400 0.47470900  
N 4.25848900 0.48423000 0.45400200  
H 4.99296900 1.17988300 0.47001100  
H 4.26836300 0.01757700 -0.44926200  
H 4.46807200 -0.21390900 1.15785600  
O -1.18900300 -1.88208600 1.64721100  
H -1.60014100 -2.29197800 0.87225600  
H -1.77687700 -0.56635600 1.72621500  
O -2.04369900 -1.97967000 -1.06569700  
H -1.98725700 -2.61850800 -1.77844400  
H -1.23662400 -1.42459800 -1.11082500  
O -2.25071300 0.37073800 1.69649300  
H -2.78736200 0.39468600 0.82731700  
H -1.55233100 1.11445100 1.60816700  
O -1.36974300 2.12831500 -1.42961200  
H -1.15719000 2.60267600 -2.23505200  
H -0.76692500 1.35551100 -1.37820700  
O -3.42029600 0.40277800 -0.57033200  
H -2.90891200 1.06639300 -1.06166000  
H -3.15893600 -0.45779200 -0.93825000  
O -0.58877100 2.25022900 1.28619300  
H -0.87970500 2.56777000 0.41743800  
H 0.28327500 1.85970200 1.10641300

**(H<sub>2</sub>SO<sub>4</sub>)(NH<sub>3</sub>)(H<sub>2</sub>O)<sub>7</sub> [0-7] Cluster (3.99 kcal/mol),  $\Delta\alpha = 8.06$ ,  $\bar{\alpha} = 114.78$**

S 1.85635700 0.16474600 -0.32732800  
O 0.69797000 -0.46507000 -0.97248300  
O 3.09636500 -0.49558100 -0.59549200  
O 1.99233400 1.60017800 -0.93575400  
H 1.16575800 2.12083200 -0.79534700  
O 1.58099400 0.34216000 1.10913100  
H 0.48276000 -0.93022800 1.50495600  
N -0.06680300 -1.81696800 1.44891700  
H -0.33655700 -2.12816900 2.37618000  
H 0.55021800 -2.48685800 0.94771500  
H -0.91594200 -1.62542100 0.89170700  
O -1.58157200 0.76584200 -1.76392800  
H -1.40858200 1.69132300 -1.54297400  
H -0.70413100 0.34141500 -1.69912600  
O -0.47863800 1.98323300 1.94338200  
H 0.34558300 1.48265100 1.81701800  
H -1.11094000 1.34310000 2.30216200  
O -2.46470700 -0.87936500 0.23478600  
H -3.11822500 -1.29464000 -0.34703100  
H -2.12213700 -0.15969800 -0.33595200

O -3.77505500 -0.93937300 -2.19247000  
H -3.89137900 -1.41549400 -3.01528400  
H -3.08643100 -0.27640100 -2.35383700  
O -2.09196400 -0.21561100 2.81636600  
H -2.52229600 -0.41661300 1.96508800  
H -2.78916100 -0.05698200 3.45514300  
O 1.75224000 -3.06685700 -0.26675400  
H 1.38179700 -2.55286800 -0.99675500  
H 2.59698700 -2.61673000 -0.13165300  
O -0.34399100 2.93441900 -0.48886300  
H -0.53024900 2.65957400 0.44715800  
H -0.29294900 3.89224700 -0.49771800

**(H<sub>2</sub>SO<sub>4</sub>)(NH<sub>3</sub>)(H<sub>2</sub>O)<sub>7</sub> [1-6] Cluster (7.54 kcal/mol),  $\Delta\alpha = 24.29$ ,  $\bar{\alpha} = 114.93$**

S 1.58847600 0.38062600 -0.33995500  
O 0.44989300 1.02209300 0.30418900  
O 2.81569300 1.13126100 -0.28851200  
O 1.81833100 -0.92797900 0.54881800  
H 2.76356700 -0.97203200 0.84210100  
O 1.23372000 -0.12024300 -1.65903300  
H -0.62766200 -0.16292700 -1.68124600  
N -1.53441500 -0.31599700 -1.21349100  
H -2.03703500 -1.09901200 -1.62533800  
H -2.09389000 0.54552200 -1.17262200  
H -1.29460100 -0.60417800 -0.25100500  
O -0.92385900 -1.42739300 1.43595700  
H -0.01220800 -1.11676600 1.50381200  
H -1.49625200 -0.73698600 1.81264000  
O -0.02745300 -2.68857400 -1.24597600  
H 0.66719700 -2.08011400 -1.53227400  
H 0.17223000 -2.82629700 -0.31620800  
O 4.40455600 -0.63165900 1.07618900  
H 4.71621700 -0.38801700 1.94972200  
H 4.26448200 0.19976600 0.59434700  
O -0.69589800 3.45801200 0.24367400  
H -0.11967000 2.67240300 0.32408800  
H -0.20886200 4.09075000 -0.28640600  
O -2.86051600 2.11806300 -0.49999300  
H -2.11235600 2.71917600 -0.26085700  
H -3.58193700 2.67374000 -0.79864200  
O -3.16145400 0.15310400 1.59222200  
H -3.58374200 -0.56053300 1.09825500  
H -3.17671900 0.92638900 1.01148600  
O -3.17695100 -2.28621500 0.02514000  
H -2.33663600 -2.41108500 0.49163200  
H -3.58534000 -3.15157600 -0.03115400

**(H<sub>2</sub>SO<sub>4</sub>)(NH<sub>3</sub>)(H<sub>2</sub>O)<sub>7</sub> [2-5] Cluster (3.57 kcal/mol),  $\Delta\alpha = 25.99$ ,  $\bar{\alpha} = 116.20$**

S -1.55001300 -0.78405900 0.13130400  
O -0.44762200 -1.62100500 0.59831200  
O -2.76924900 -1.47293100 -0.16701300  
O -1.81730800 0.17329000 1.34616400  
H -2.77931400 0.47986200 1.29907100

O -1.10460200 0.08862000 -0.97315700  
 H 0.49744000 0.40220700 -1.20740300  
 N 1.49636600 0.47238700 -1.53387600  
 H 1.50284700 0.57143900 -2.54431100  
 H 1.95426100 -0.41138100 -1.29433000  
 H 1.99945300 1.27834400 -1.09786800  
 O 1.16369600 0.52139400 1.43895000  
 H 0.44452100 1.11872800 1.66459600  
 H 0.73566100 -0.34776400 1.42771700  
 O 2.84500300 2.59075900 -0.42106600  
 H 3.46742200 3.18823300 -0.83734500  
 H 3.33083900 2.13131900 0.30867500  
 O -3.29239700 1.82339900 -1.44341200  
 H -2.94653000 2.71715200 -1.42242900  
 H -2.51461800 1.23969300 -1.43184300  
 O 1.68070600 -2.35446500 -0.78212200  
 H 0.85219600 -2.18609200 -0.27538400  
 H 1.53293000 -3.15991500 -1.27997900  
 O -4.29725200 0.76214200 0.90540500  
 H -4.15199100 1.24168000 0.06803400  
 H -4.51177700 -0.13581000 0.62538500  
 O 4.09804800 -1.12673500 -0.37558700  
 H 3.36990200 -1.76910700 -0.34404200  
 H 4.90681500 -1.63424600 -0.46026900  
 O 3.88280100 1.04200300 1.46355400  
 H 2.99090300 0.83788500 1.78567400  
 H 4.11009900 0.26425500 0.93209800

**(H<sub>2</sub>SO<sub>4</sub>)(NH<sub>3</sub>)(H<sub>2</sub>O)<sub>7</sub> [3-4] Cluster (0.00 kcal/mol),  $\Delta\alpha = 23.04$ ,  $\bar{\alpha} = 115.67$**

S 0.53587900 -0.28748000 -0.68214800  
 O -0.67203500 -0.27845700 -1.48589300  
 O 1.63492600 -1.02860800 -1.24272700  
 O 0.96424300 1.22761600 -0.63703800  
 H 1.91580100 1.30427300 -0.23945100  
 O 0.25309300 -0.66589200 0.70887600  
 H -1.27996300 -0.12636100 1.18102700  
 N -2.22136700 0.29838600 1.35522100  
 H -2.11937700 1.03562800 2.04633300  
 H -2.89910600 -0.43166500 1.63001800  
 H -2.52187900 0.74084400 0.46547500  
 O -2.63283400 1.64456900 -1.12068300  
 H -2.28324000 2.47679700 -0.78119000  
 H -1.86186600 1.18651200 -1.49463900  
 O -0.89075100 2.76679700 0.85810300  
 H -0.49122500 3.56378900 1.21167100  
 H -0.17768000 2.30694900 0.38312100  
 O 4.23820000 -1.16752600 -0.43821700  
 H 4.82330800 -1.70560800 -0.97322700  
 H 3.35194300 -1.23444100 -0.83847200  
 O -3.29500400 -1.23739900 -1.13513000  
 H -2.34409300 -1.15343600 -1.30853600  
 H -3.67144000 -0.41628100 -1.46646500  
 O 3.24501400 1.32462700 0.43861100

H 3.11941900 0.70839100 1.19464000  
H 3.88409200 0.84676100 -0.10829100  
O 2.79156300 -0.81731000 2.04330800  
H 1.89657700 -0.98267700 1.71144900  
H 3.37240600 -1.32662900 1.46356800  
O -4.09915700 -1.74926600 1.40808700  
H -3.91442500 -1.78133100 0.44978400  
H -4.12180900 -2.65373700 1.72264500

**(H<sub>2</sub>SO<sub>4</sub>)(NH<sub>3</sub>)(H<sub>2</sub>O)<sub>7</sub> [4-3] Cluster (1.02 kcal/mol),  $\Delta\alpha = 22.08$ ,  $\bar{\alpha} = 115.98$**

S 0.04819700 -0.38993500 -0.39825500  
O 1.38267000 -0.87104100 -0.72773500  
O -1.02193800 -1.19534900 -0.96160100  
O -0.03051900 -0.52343900 1.15268800  
H -1.00430600 -0.29022600 1.49417700  
O -0.11914200 1.02378600 -0.72369000  
H 1.33187600 1.83539200 -0.46031500  
N 2.31081800 2.07047600 -0.16209000  
H 2.47410700 3.07033300 -0.16235100  
H 2.96898700 1.57028900 -0.79376400  
H 2.42500300 1.65524900 0.79637800  
O -2.33891300 -0.02446300 1.89368900  
H -2.88512900 -0.71236500 1.46133500  
H -2.65271600 0.82059000 1.51203900  
O -3.52874000 -1.88079000 0.24600900  
H -3.94395500 -1.32679900 -0.42513900  
H -2.65603600 -2.05830600 -0.13180800  
O 2.42306100 0.61647400 2.13681100  
H 1.54092600 0.21961200 2.07297500  
H 3.01927500 -0.10773300 1.89121200  
O -3.27585800 2.09711500 0.45068600  
H -4.19159600 2.34992200 0.57927800  
H -3.25061200 1.60141600 -0.38768100  
O 3.63785900 -1.43817200 0.64124600  
H 2.75525300 -1.45239300 0.22207800  
H 3.85025800 -2.34303300 0.87650700  
O -3.21370900 0.29615600 -1.67921300  
H -2.35709300 -0.15186400 -1.53264700  
H -3.20666300 0.58133900 -2.59473200  
O 3.79193100 0.27048500 -1.68566200  
H 4.21775000 -0.27674500 -1.01240200  
H 2.96417200 -0.20515400 -1.84423000

**(H<sub>2</sub>SO<sub>4</sub>)(NH<sub>3</sub>)(H<sub>2</sub>O)<sub>7</sub> [5-2] Cluster (4.11 kcal/mol),  $\Delta\alpha = 19.59$ ,  $\bar{\alpha} = 115.83$**

S -0.50400300 0.19802700 -0.30250200  
O -1.68723200 0.99264900 -0.55272300  
O 0.65330500 0.53714500 -1.09238800  
O -0.16103700 0.54908200 1.19944500  
H 0.64981000 0.02009200 1.51062500  
O -0.79287400 -1.24144200 -0.32620500  
H -2.43464000 -1.46064500 0.01223900  
N -3.42706000 -1.25481700 0.28341800  
H -3.92852900 -2.09506500 0.54768800

H -3.87154200 -0.77655300 -0.52249900  
H -3.36278900 -0.58347100 1.08008400  
O 1.89832500 -0.84034900 1.83197400  
H 1.96005800 -1.27332000 2.68557800  
H 1.90240600 -1.56321600 1.11657000  
O 2.23558900 2.71507300 -0.18297000  
H 1.74250900 3.12616900 0.52902500  
H 1.62592000 2.07101200 -0.57424700  
O -2.82454700 0.58999200 2.26943100  
H -3.17230800 1.45707400 2.04508300  
H -1.87822600 0.65267700 2.05981800  
O 3.15227800 -0.87722000 -1.76769800  
H 3.63335500 -0.35950300 -1.09420300  
H 2.37024700 -0.34049900 -1.94050300  
O 1.79996600 -2.49819600 -0.10497900  
H 2.36006100 -2.04354500 -0.77900100  
H 0.89049000 -2.33954200 -0.39142600  
O 4.02958800 0.61329900 0.41986500  
H 3.45661500 0.17480100 1.06028100  
H 3.58956000 1.46234100 0.25658400  
O -4.06749500 0.48188400 -1.75171900  
H -3.18036200 0.84395100 -1.57951800  
H -4.18608600 0.46718700 -2.70234100

**(H<sub>2</sub>SO<sub>4</sub>)(NH<sub>3</sub>)(H<sub>2</sub>O)<sub>7</sub> [6-1] Cluster (7.31 kcal/mol),  $\Delta\alpha = 21.89$ ,  $\bar{\alpha} = 117.11$**

S -1.06870600 0.40330600 -0.31254800  
O -2.21187300 1.22528000 -0.65626700  
O 0.21768400 0.95779500 -0.68634300  
O -1.11403400 0.25457300 1.21966500  
H -0.28661400 -0.33152700 1.58797400  
O -1.22316800 -0.96169200 -0.87689500  
H -2.72091400 -1.20792400 -0.96654100  
N -3.80686000 -1.15201800 -0.94697800  
H -4.24678000 -2.06321200 -1.01117500  
H -4.09792600 -0.56222800 -1.72176800  
H -4.05498900 -0.65852000 -0.05329200  
O 0.74930600 -1.12791400 2.00585200  
H 1.00528700 -1.69838700 1.24132500  
H 1.54934200 -0.63432700 2.27833300  
O 1.98039900 3.10340600 -1.03415100  
H 1.90582100 3.58822000 -1.85703400  
H 1.15926200 2.59471000 -0.95111300  
O 1.15032900 -2.44343400 -0.27582100  
H 0.43190400 -2.02072700 -0.76488500  
H 1.96404800 -2.33113700 -0.79537500  
O 2.93896000 0.59925000 -0.30597300  
H 3.00176900 1.50976400 -0.63656600  
H 1.98072700 0.43695400 -0.36125300  
O 3.03750100 0.30098500 2.44645600  
H 2.99402900 1.14993800 2.88944100  
H 3.17230400 0.49793700 1.50166800  
O 3.56403300 -1.80512400 -1.53025400  
H 3.54513700 -0.89252900 -1.19507300

H 3.71059600 -1.74167900 -2.47471500  
O -4.10986000 0.48288900 1.21743800  
H -3.60336700 0.21921600 1.99161200  
H -3.49653300 1.06856600 0.73838900

**(H<sub>2</sub>SO<sub>4</sub>)(NH<sub>3</sub>)(H<sub>2</sub>O)<sub>7</sub> [7-0] Cluster (7.00 kcal/mol),  $\Delta\alpha = 21.02$ ,  $\bar{\alpha} = 117.61$**

S 1.29602700 -0.77678200 -0.09386100  
O 2.22455700 -1.46428400 -0.94168900  
O 0.05625900 -0.35563700 -0.73242000  
O 0.99578300 -1.50924800 1.14834400  
H -0.33418000 -1.49399000 1.52752400  
O 1.98378400 0.55929000 0.36124300  
H 3.00099600 0.51505200 0.18672700  
N 4.50055900 0.22405700 -0.23080600  
H 4.95505300 0.89697000 -0.83493400  
H 4.30907200 -0.61714500 -0.76955500  
H 5.14110800 -0.01409600 0.51592400  
O -1.36445600 -1.45635700 1.79987100  
H -1.63673500 -0.48918200 1.84187600  
H -1.92296100 -1.92739900 1.08811300  
O -2.09003400 -1.35171000 -2.23241600  
H -2.46697200 -0.46505200 -2.15401500  
H -1.15930200 -1.20724400 -2.00269800  
O 0.05103600 2.46691300 1.18672400  
H 0.79402900 1.91570100 0.89858300  
H -0.16853400 3.05307400 0.43998800  
O -2.11589300 1.29955600 -1.03800200  
H -1.26001300 0.85657800 -0.89142500  
H -2.52648900 1.27467500 -0.16461600  
O -1.99784700 1.05160200 1.82989600  
H -2.37178000 1.39248600 2.64494900  
H -1.18446900 1.61100700 1.62046800  
O -0.86253600 3.76641600 -1.06744400  
H -1.45229100 3.01253100 -1.24434900  
H -1.38255400 4.56271700 -1.17878000  
O -2.78502400 -2.55081000 0.00680100  
H -2.57233200 -2.15812700 -0.88128300  
H -2.76701800 -3.50428800 -0.09235500

**(H<sub>2</sub>SO<sub>4</sub>)(NH<sub>3</sub>)(H<sub>2</sub>O)<sub>8</sub> [0-8] Cluster (0.79 kcal/mol),  $\Delta\alpha = 12.70$ ,  $\bar{\alpha} = 124.42$**

S -2.40311900 -0.24141800 -0.28685600  
O -0.94378200 -0.49644900 -0.34612200  
O -3.19610700 -1.35998800 -0.66438800  
O -2.68507300 -0.02552600 1.25675600  
H -2.17333600 0.75289000 1.55404800  
O -2.70894800 1.01985300 -0.94662200  
H 0.80666800 1.38854700 -1.16706800  
N 1.53213100 0.67465000 -1.01451700  
H 2.48056700 1.03033300 -1.22672700  
H 1.31543000 -0.14949500 -1.58327200  
H 1.48663100 0.40054100 -0.01665500  
O -0.04445000 -2.03491800 1.70717900  
H -0.71572000 -2.47217900 2.23409900



H -0.51329000 -1.57729200 0.97978300  
O -0.93585900 2.12428900 1.70352400  
H -0.81519400 2.44522600 0.78690500  
H -1.19398100 2.88313700 2.23120900  
O 3.96654800 -0.21038000 0.97637200  
H 3.51782600 -0.99931600 0.62750900  
H 3.30872700 0.17171300 1.57145000  
O 2.22398800 -2.19396200 0.05217200  
H 1.78535400 -2.34009100 -0.79604000  
H 1.55643100 -2.41711200 0.71549900  
O -0.64279000 2.56750400 -0.98818100  
H -0.79329100 3.38411400 -1.46767400  
H -1.46279000 2.00506100 -1.09727300  
O 0.50578200 -1.81913700 -2.17090100  
H -0.25501100 -1.52658200 -1.63213400  
H 0.15407500 -2.25793400 -2.94677200  
O 1.31790500 0.39166300 1.85320900  
H 0.61754900 1.04483100 1.99652600  
H 0.90197200 -0.46609200 2.03861400  
O 4.19732200 1.48436500 -1.07816500  
H 4.31539300 0.88333300 -0.30856800  
H 4.96468300 1.37801400 -1.64080200

**(H<sub>2</sub>SO<sub>4</sub>)(NH<sub>3</sub>)(H<sub>2</sub>O)<sub>8</sub> [1-7] Cluster (2.03 kcal/mol),  $\Delta\alpha = 14.56$ ,  $\bar{\alpha} = 123.86$**

S 1.94377400 -0.09342900 0.14727200  
O 1.99202200 -1.47755700 -0.27018800  
O 3.17094700 0.46818100 0.63814300  
O 1.61194200 0.68473600 -1.21810300  
H 1.77163900 1.63858300 -1.06363300  
O 0.79539100 0.17245200 1.01531000  
H -1.63539400 -0.46636300 0.14311600  
N -2.10881400 -0.14342900 1.00331100  
H -1.92245200 0.85733100 1.09412200  
H -1.69816800 -0.64702100 1.81526700  
H -3.12460700 -0.26483100 0.90630500  
O -1.00395300 -0.40327100 -1.66344700  
H -0.18936400 0.11853300 -1.62855100  
H -0.70755700 -1.27604500 -1.96923000  
O -0.69865000 2.34216300 0.33124600  
H -0.19132900 3.15463600 0.40654800  
H -0.06706500 1.64099200 0.58187100  
O 2.25991800 3.04349800 0.05206200  
H 2.84127300 3.74996300 -0.23582600  
H 2.81710000 2.41391000 0.53974500  
O -0.52052600 -2.67647100 0.55285400  
H 0.32782400 -2.23831500 0.38501400  
H -0.59044200 -3.30791500 -0.16882800  
O -0.61988900 -1.38906400 3.01745800  
H -0.55976200 -2.21839400 2.52431700  
H 0.15250600 -0.89248000 2.71628300  
O -4.69934200 0.48612800 0.22912600  
H -4.22616800 0.99820400 -0.45630600  
H -5.56613400 0.27614500 -0.11810400

O -2.88491800 1.66468300 -1.42446600  
H -2.20106500 2.13054900 -0.92277200  
H -2.40521100 0.91979300 -1.81405200  
O 0.45124800 -2.75159300 -2.18592700  
H 1.18550500 -2.35900300 -1.68369100  
H 0.81666200 -3.04049300 -3.02366500

**(H<sub>2</sub>SO<sub>4</sub>)(NH<sub>3</sub>)(H<sub>2</sub>O)<sub>8</sub> [2-6] Cluster (2.29 kcal/mol),  $\Delta\alpha = 23.39$ ,  $\bar{\alpha} = 124.17$**

S -1.91451400 -0.77383800 -0.49812600  
O -1.04368400 -1.90003400 -0.81995600  
O -3.28271100 -1.10880500 -0.19924700  
O -1.26979000 -0.25676800 0.87052200  
H -1.90912500 0.33147100 1.31483700  
O -1.75691800 0.30185100 -1.46020800  
H 1.94035500 -0.71610100 -1.34690900  
N 1.11395800 -0.19545900 -1.73649100  
H 1.32372900 0.17223200 -2.65845900  
H 0.86173900 0.59785900 -1.10570700  
H 0.30752400 -0.83084900 -1.77772700  
O 1.53361800 0.10638800 1.91854300  
H 1.18556500 -0.77368400 1.71140900  
H 2.49091500 0.06014600 1.79579700  
O 0.74830100 1.90431300 0.08003100  
H -0.15028700 2.29536400 0.10120100  
H 0.85801200 1.32429900 0.86380300  
O -1.81708400 2.75994400 -0.18566300  
H -2.49421800 2.62855600 0.48683800  
H -1.95512000 2.01635500 -0.79653300  
O 0.87904100 -2.53941900 0.96865000  
H 0.10336900 -2.39713800 0.38531700  
H 0.65401400 -3.27046100 1.54640400  
O -3.63924200 1.09930800 1.43873300  
H -4.18644800 1.06086900 2.22491500  
H -3.91876500 0.36203700 0.86748900  
O 3.04745500 -1.72974500 -0.58956600  
H 3.64162300 -1.20247100 -0.03474200  
H 2.46224800 -2.21105200 0.01742800  
O 3.20244100 2.03081400 -0.88279400  
H 2.30962400 2.22333300 -0.52116700  
H 3.57925700 2.86899600 -1.15465900  
O 4.23097100 0.29247800 0.93171400  
H 4.00252900 1.00819000 0.30292900  
H 5.06880300 0.51907600 1.33692200

**(H<sub>2</sub>SO<sub>4</sub>)(NH<sub>3</sub>)(H<sub>2</sub>O)<sub>8</sub> [3-5] Cluster (0.00 kcal/mol),  $\Delta\alpha = 26.59$ ,  $\bar{\alpha} = 125.33$**

S -0.90374600 0.40153900 -0.08109500  
O 0.46329100 0.78779300 -0.38465300  
O -1.84628400 1.49386000 -0.04928500  
O -1.28862200 -0.51839600 -1.29892600  
H -2.26829600 -0.82640200 -1.21374000  
O -0.96266800 -0.44294900 1.11104300  
H 0.79950100 -1.03842000 1.49690800  
N 1.77435000 -1.07863300 1.16937000

H 2.40106000 -1.67641700 1.70427000  
H 2.17760500 -0.12687100 1.17839500  
H 1.74827000 -1.39752600 0.19191000  
O 3.49430900 -0.43912000 -1.31170500  
H 2.73668400 -0.89644700 -1.69845500  
H 3.32453600 0.50198800 -1.44791500  
O 1.10771000 -1.96259800 -1.54613500  
H 0.97110400 -2.84952800 -1.88386600  
H 0.25211600 -1.50437800 -1.61661100  
O -4.55229400 1.22944100 0.16531300  
H -5.03729400 2.05473200 0.12682000  
H -3.60588600 1.45950600 0.09908400  
O 2.52735700 2.24944100 -1.12277600  
H 1.61967200 1.90514100 -1.00395600  
H 2.47149700 3.06386700 -1.62379400  
O -3.70002100 -1.20944300 -0.96936200  
H -3.74622100 -1.40109600 -0.00762500  
H -4.23575000 -0.40666000 -1.04015900  
O -3.68223000 -1.03758800 1.75274600  
H -2.74201100 -0.80387300 1.77706500  
H -4.14295800 -0.19556000 1.64711200  
O 3.18091100 1.42064600 1.42956900  
H 3.07219600 1.86100000 0.56748600  
H 2.85539500 2.04650900 2.08002300  
O 4.55576700 -1.22726200 1.21380200  
H 4.38202300 -1.05121000 0.27552100  
H 4.62842200 -0.34314200 1.58641300

**(H<sub>2</sub>SO<sub>4</sub>)(NH<sub>3</sub>)(H<sub>2</sub>O)<sub>8</sub> [4-4] Cluster (1.83 kcal/mol),  $\Delta\alpha = 28.10$ ,  $\bar{\alpha} = 125.53$**

S -0.33993400 -0.41198200 0.16718500  
O 0.73360500 -1.19173200 0.76931300  
O -1.59559200 -1.12936600 0.07388200  
O -0.52563600 0.78953000 1.12982900  
H -1.17589800 1.48263700 0.71542400  
O 0.06349900 0.14813900 -1.13114200  
H 1.53949000 -0.61746600 -1.55056200  
N 2.45866900 -1.11519900 -1.56394200  
H 2.45110800 -1.86100100 -2.25111300  
H 2.59527900 -1.49836000 -0.62415100  
H 3.25240300 -0.43925600 -1.72830200  
O -2.08697700 2.42859900 0.05249000  
H -2.97781900 2.00274800 -0.10232900  
H -1.74885100 2.67368600 -0.81193400  
O -4.10710400 -1.14539500 1.21943800  
H -4.19810400 -1.49092400 2.10839200  
H -3.15825900 -1.17373200 1.00959500  
O 2.29766000 1.82236400 -0.26273900  
H 1.43853400 1.54967400 -0.61021100  
H 2.29290100 1.53150300 0.66081800  
O -4.36036200 1.19469800 -0.32127200  
H -4.48621200 0.61222700 0.44225000  
H -4.22759000 0.55209700 -1.04053000  
O 2.43212600 0.32508100 2.19171000

H 1.69651600 -0.22999600 1.85676000  
H 2.17462500 0.64759800 3.05665700  
O -3.76213500 -1.12262200 -1.77572200  
H -4.28670000 -1.63377100 -1.15100800  
H -2.87201000 -1.15677700 -1.39638700  
O 4.27907700 -1.06110700 0.72840300  
H 3.77051000 -0.56244700 1.39367700  
H 4.80028500 -1.69782400 1.22039700  
O 4.46125800 0.70227600 -1.54809800  
H 3.83689900 1.33862100 -1.15173000  
H 4.87580300 0.28515500 -0.78180500

**(H<sub>2</sub>SO<sub>4</sub>)(NH<sub>3</sub>)(H<sub>2</sub>O)<sub>8</sub> [5-3] Cluster (3.98 kcal/mol),  $\Delta\alpha = 27.88$ ,  $\bar{\alpha} = 125.75$**

S -0.38373200 -0.33222000 -0.03300600  
O -1.54379300 -0.47773700 -0.89088100  
O 0.76023600 -1.14854200 -0.42444500  
O 0.03360200 1.15413100 -0.19688900  
H 0.92591000 1.35683800 0.36396600  
O -0.70840700 -0.53956300 1.38031300  
H -2.32140700 -0.28289800 1.57701500  
N -3.35339500 -0.08970400 1.46276100  
H -3.82295100 -0.00094700 2.35691800  
H -3.76597500 -0.84652200 0.90069300  
H -3.44875400 0.77886600 0.91756900  
O 2.09288700 1.53682800 1.09021100  
H 2.28128700 0.69383900 1.53712300  
H 2.85943900 1.68693300 0.47598100  
O 4.10574500 1.67223600 -0.62807400  
H 4.62931800 0.93699900 -0.26634100  
H 3.67911800 1.25368800 -1.38857100  
O -2.53308800 2.30996900 0.03877400  
H -2.55705500 3.25833800 0.17527900  
H -1.60442400 2.07728500 -0.12445500  
O 2.86654300 -0.47732400 -2.06384800  
H 2.73801700 -0.78259700 -2.96322100  
H 2.04273000 -0.68605500 -1.58675600  
O 2.43908200 -1.17935600 1.78606000  
H 2.04854500 -1.54413900 2.58247100  
H 1.80490500 -1.36538300 1.06979800  
O 4.77186100 -0.95820000 0.07917800  
H 4.18097500 -1.18309000 0.80878100  
H 4.24087000 -1.10382700 -0.71519400  
O -3.73166200 -1.98485100 -0.62842400  
H -2.83733800 -1.66481300 -0.85654900  
H -3.78008600 -2.90903900 -0.87538600  
O -4.70626100 0.73831800 -0.94925100  
H -3.91492400 1.24985600 -1.15349600  
H -4.53868900 -0.14717200 -1.28864100

**(H<sub>2</sub>SO<sub>4</sub>)(NH<sub>3</sub>)(H<sub>2</sub>O)<sub>8</sub> [6-2] Cluster (4.11 kcal/mol),  $\Delta\alpha = 23.85$ ,  $\bar{\alpha} = 125.95$**

S 0.74040700 -0.26236600 -0.56041100  
O 1.97505100 -0.27923400 -1.31007000  
O -0.43851800 -0.64167100 -1.29668800

O 0.97482800 -1.35396600 0.54646700  
H 0.11578900 -1.57125300 1.04482100  
O 0.55975500 1.00979100 0.15655400  
H 1.99095300 1.59662400 0.63742300  
N 2.99752800 1.73891800 0.93987700  
H 3.33342200 0.79907800 1.26661500  
H 3.07665400 2.44989400 1.65794000  
H 3.57396200 1.95790700 0.12230900  
O -1.22602900 -1.92170800 1.71181500  
H -1.21007300 -2.33563000 2.57663300  
H -1.85556400 -1.12483100 1.76263800  
O -2.28672000 -2.87039300 -0.86330200  
H -2.05125500 -2.79250100 0.07007200  
H -1.51977700 -2.48908500 -1.30701600  
O -1.74598600 2.42885200 1.05003100  
H -0.97641800 2.05803200 0.59802400  
H -2.39883100 2.62207100 0.35722200  
O -3.21582300 -0.23027100 -1.11707600  
H -3.31921300 -1.19371000 -1.16698200  
H -2.26018500 -0.12622800 -1.25293200  
O -2.85876400 0.02891600 1.66309300  
H -2.44846700 0.92013200 1.64870100  
H -3.19302200 -0.06624900 0.75464200  
O -3.80294100 2.47896600 -0.89266900  
H -3.84016200 1.53238400 -1.10051800  
H -4.68469300 2.72267300 -0.60737100  
O 4.45653200 0.71868500 -1.19386100  
H 4.96785200 0.79169500 -2.00101700  
H 3.58597700 0.35324900 -1.44364000  
O 3.75054200 -0.85809100 1.21660200  
H 4.23777500 -0.85918100 0.38356600  
H 2.91065200 -1.29865900 1.01916500

**(H<sub>2</sub>SO<sub>4</sub>)(NH<sub>3</sub>)(H<sub>2</sub>O)<sub>8</sub> [7-1] Cluster (12.20 kcal/mol),  $\Delta\alpha = 18.76$ ,  $\bar{\alpha} = 125.26$**

S -1.50178000 -0.63052200 -0.55318500  
O -2.90314300 -0.93955100 -0.66825600  
O -0.58635700 -1.54090300 -1.18734300  
O -1.36172800 0.77766600 -1.25967700  
H -0.45125000 1.16016400 -1.04343500  
O -1.11843800 -0.36876500 0.85798600  
H -2.49063700 -0.00718700 1.57230800  
N -3.52731900 0.21367900 1.72449200  
H -3.73773000 0.51797500 2.66818900  
H -4.03392000 -0.63457300 1.48150100  
H -3.76116300 0.94299500 1.00738300  
O 0.94197800 1.65191400 -0.53189500  
H 1.22480900 1.07738900 0.20016300  
H 1.68155000 1.55198600 -1.16631900  
O 3.23650000 0.88231300 -1.70102800  
H 3.77809100 0.99144600 -2.48297000  
H 2.91017300 -0.06704000 -1.68418600  
O 0.29520000 -2.82265600 1.40850200  
H 0.13527700 -3.13711800 0.51312300

H -0.12558100 -1.95171100 1.40405300  
O 2.27278000 -1.48226200 -1.38774700  
H 1.30507800 -1.51411000 -1.37826100  
H 2.56910300 -1.79110500 -0.50372300  
O 3.03250800 0.74188100 1.15378500  
H 2.99642900 1.63749000 1.51713400  
H 3.46614500 0.83427900 0.29347100  
O 3.00216300 -2.10125600 1.16552900  
H 3.06071100 -1.19164100 1.48611900  
H 2.13117600 -2.42410600 1.44887900  
O 2.11991600 3.41797200 1.41841800  
H 1.60286300 3.15438400 0.64487600  
H 2.48888800 4.27870100 1.21592400  
O -3.76281200 1.99372600 -0.34956400  
H -2.93402800 1.71418700 -0.77672300  
H -4.44481600 1.76955900 -0.98766900

**(H<sub>2</sub>SO<sub>4</sub>)(NH<sub>3</sub>)(H<sub>2</sub>O)<sub>8</sub> [8-0] Cluster (6.19 kcal/mol),  $\Delta\alpha = 29.50$ ,  $\bar{\alpha} = 126.59$**

S -2.01642200 -0.72958000 -0.01144700  
O -3.20706600 -1.50858200 -0.07440900  
O -1.02727900 -1.04722600 0.98293300  
O -1.36757700 -0.73380700 -1.39175300  
H -0.40871500 -0.28266100 -1.35431100  
O -2.38970300 0.75174900 0.24642800  
H -3.33345500 0.95195100 -0.16375800  
N -4.75291600 0.99133400 -0.76574900  
H -5.45032600 1.48488600 -0.22224900  
H -4.98649000 0.00205800 -0.76493000  
H -4.80145500 1.32670200 -1.72030800  
O 0.81661600 0.37920100 -1.15348300  
H 1.64904300 0.11560000 -1.63329600  
H 1.07434400 0.30938900 -0.20925400  
O 1.23369900 -2.41672600 1.53501600  
H 1.11002000 -3.04705100 2.24668300  
H 0.34662800 -2.09490700 1.28792800  
O -0.18385700 2.04098700 1.85639300  
H -0.99802800 1.65912600 1.50922500  
H 0.16001600 2.61199800 1.14542400  
O 1.81019600 0.34726700 1.42051900  
H 1.74029900 -0.55616800 1.75596400  
H 1.05581800 0.87617500 1.77620000  
O 3.22652700 -0.23159900 -1.95936500  
H 3.34695500 -1.06643900 -1.47356200  
H 3.65487100 0.44991000 -1.42160100  
O 1.12613500 3.15449700 -0.35815900  
H 2.07068500 3.00040000 -0.22145000  
H 0.86974400 2.42510400 -0.93673400  
O 3.20421800 -2.59343500 -0.47198800  
H 3.07520100 -3.39627700 -0.97949000  
H 2.50710700 -2.59247600 0.20358100  
O 3.66423700 1.76694500 0.05702800  
H 4.45818500 2.04744000 0.51526200  
H 3.14355900 1.23499200 0.69079300

**(H<sub>2</sub>SO<sub>4</sub>)(NH<sub>3</sub>)(H<sub>2</sub>O)<sub>9</sub> [0-9] Cluster (4.87 kcal/mol),  $\Delta\alpha = 19.23$ ,  $\bar{\alpha} = 134.27$**

S -2.87858400 -0.05300000 -0.62363600  
O -2.03661300 -1.13461800 -0.12307100  
O -3.88409100 -0.41887000 -1.56596100  
O -3.63447100 0.41275300 0.71186400  
H -4.49876200 0.76274200 0.46832300  
O -2.06497900 1.10201000 -1.00667000  
H -0.38398200 0.68614200 -0.89353800  
N 0.55354500 0.39583100 -0.54668300  
H 1.31784600 0.58595200 -1.22214100  
H 0.52566700 -0.60652600 -0.32586300  
H 0.72932500 0.92538800 0.30515200  
O -0.78148200 -0.35625900 2.27786000  
H -0.79531000 0.61171000 2.17971700  
H -1.39193600 -0.68378900 1.59775800  
O -0.88944500 2.27814300 1.39583600  
H -0.15115300 2.81036700 1.07148500  
H -1.47630400 2.14052300 0.63787000  
O 3.06826800 -0.79810200 0.78380600  
H 2.52935500 -1.23994400 1.46257900  
H 3.10814200 -1.39580000 0.02378800  
O 2.63662300 -2.18930000 -1.64401600  
H 1.75327700 -2.44266900 -1.31257400  
H 3.00163400 -2.96234400 -2.07791300  
O 1.53596800 3.11526900 0.10448700  
H 2.43130200 2.74895400 0.20182100  
H 1.53996000 3.61170900 -0.71600100  
O 2.80168200 0.64097300 -2.19727700  
H 2.96169700 -0.31217400 -2.22888000  
H 3.45841400 1.00763900 -1.59005600  
O 1.19070900 -2.03062600 2.37994500  
H 1.25211900 -2.48820600 3.21964100  
H 0.46706100 -1.35118900 2.46119200  
O 3.90165800 1.65295000 0.23292000  
H 4.72780100 1.90055500 0.65098400  
H 3.65530600 0.76477500 0.57786400  
O 0.34298200 -2.52611600 -0.23492400  
H 0.53360500 -2.64136600 0.70963500  
H -0.60700200 -2.34092500 -0.31428000

**(H<sub>2</sub>SO<sub>4</sub>)(NH<sub>3</sub>)(H<sub>2</sub>O)<sub>9</sub> [1-8] Cluster (5.71 kcal/mol),  $\Delta\alpha = 13.86$ ,  $\bar{\alpha} = 134.46$**

S 2.13982000 -0.40721500 -0.56217200  
O 1.73167700 0.99072900 -0.57782600  
O 3.49703000 -0.63971500 -0.14732400  
O 1.20759200 -0.99623600 0.61540000  
H 1.62078400 -1.83055200 0.94823100  
O 1.73422200 -1.11732000 -1.75628600  
H -0.05674800 -1.03644900 -1.79048200  
N -1.02160800 -0.83487300 -1.47231800  
H -1.74211700 -1.14412400 -2.12476400  
H -1.12473700 0.18550500 -1.29986800  
H -1.21329800 -1.32747000 -0.57723600

O -2.15382900 -2.16181600 0.70902300  
H -2.92109600 -2.28920000 0.13465400  
H -2.44828300 -1.56371500 1.41130500  
O -3.75486400 -1.62661200 -1.59141000  
H -4.56583700 -1.88001100 -2.03406900  
H -3.93598400 -0.77624100 -1.12720600  
O 2.88634000 -2.96652500 1.24726700  
H 3.51552700 -2.38448000 0.79200400  
H 2.89225200 -3.79570000 0.76510600  
O 1.60478600 2.86271200 1.34267100  
H 1.88001700 2.16628000 0.71257300  
H 2.39095800 3.12554600 1.82477800  
O 0.59940400 3.46349100 -1.37599300  
H 0.87857300 3.77651700 -0.50718500  
H 1.15852300 2.68764500 -1.51681000  
O -1.44729900 1.80971400 -0.63626500  
H -1.08655400 1.61793000 0.24699800  
H -0.85340400 2.49940500 -0.99738000  
O -3.92472200 0.63526800 -0.18389300  
H -3.73959200 0.48000100 0.75377900  
H -3.24103800 1.26443600 -0.46151700  
O -0.36918800 0.97507300 1.83558200  
H 0.19177500 0.24715400 1.51785200  
H 0.24102500 1.71992400 1.96827200  
O -2.83679600 0.03040200 2.39317800  
H -3.16403800 0.08734200 3.29214600  
H -1.95739800 0.45649600 2.37679900

**(H<sub>2</sub>SO<sub>4</sub>)(NH<sub>3</sub>)(H<sub>2</sub>O)<sub>9</sub> [2-7] Cluster (5.40 kcal/mol),  $\Delta\alpha = 22.21$ ,  $\bar{\alpha} = 133.54$**

S -1.80013200 -0.95270400 -0.20901200  
O -0.89293400 -2.07202600 -0.06751300  
O -3.20518500 -1.26997300 -0.19987100  
O -1.52692500 -0.07951400 1.09432900  
H -2.35067600 0.37176200 1.36706800  
O -1.41072400 -0.10748900 -1.34239100  
H 0.16286200 -0.93282100 -1.93041800  
N 1.14525100 -1.01779600 -2.22944600  
H 1.20494800 -1.51201500 -3.11250000  
H 1.73394600 -1.50234400 -1.47424700  
H 1.52237100 -0.05818600 -2.30063700  
O 2.14867900 1.47544000 -1.48573500  
H 1.52580300 2.21116800 -1.54833600  
H 2.01511400 1.16933500 -0.56722900  
O -0.33359600 2.37133400 -0.50650800  
H -1.17313400 2.83765900 -0.39836600  
H -0.63668100 1.51829900 -0.85754000  
O -3.15868300 2.30445400 -0.73819900  
H -3.72619900 1.99085200 -0.02488700  
H -2.95530900 1.51493700 -1.25290300  
O 1.02512500 -1.84270700 1.79946100  
H 0.23935900 -2.05894400 1.25845500  
H 0.88555000 -2.21108800 2.67294100  
O -4.18479900 0.66140000 1.40884700



H -4.78820300 0.58059800 2.14900900  
H -4.24464300 -0.15699400 0.88577800  
O 2.78072900 -1.95712800 -0.38694300  
H 3.46146900 -1.25308700 -0.32003600  
H 2.36766300 -2.03718100 0.48562300  
O 4.49139300 0.17193100 -0.41477300  
H 4.09765700 0.80715300 -1.02314900  
H 4.48374500 0.62642200 0.44551000  
O 3.91690400 1.43431800 1.99583900  
H 2.96083300 1.38916200 1.82618200  
H 4.10811600 2.33292000 2.26657700  
O 1.37570000 0.83980100 1.09880700  
H 0.56172900 1.33784800 0.92416500  
H 1.12355700 -0.03633500 1.43645500

**(H<sub>2</sub>SO<sub>4</sub>)(NH<sub>3</sub>)(H<sub>2</sub>O)<sub>9</sub> [3-6] Cluster (1.46 kcal/mol),  $\Delta\alpha = 24.35$ ,  $\bar{\alpha} = 134.88$**

S 0.66972500 -0.67550500 -0.06424200  
O -0.76302900 -0.94771700 -0.01475200  
O 1.49684400 -1.84800400 -0.12583200  
O 0.83469400 0.13222600 -1.38888600  
H 1.71557300 0.68373200 -1.39682600  
O 1.06019700 0.23415100 1.02719800  
H -0.45259200 1.38772900 1.08066500  
N -1.18665700 2.04683000 0.79127400  
H -0.89836700 2.98250000 1.05989000  
H -2.10528800 1.74995700 1.19191500  
H -1.28931500 1.97010500 -0.25730300  
O -1.61156100 1.59196000 -1.84160200  
H -2.44528400 1.09301300 -1.81468900  
H -0.90890600 0.94855700 -2.00369200  
O 1.63188600 2.94718300 0.90143100  
H 2.29307200 3.29899100 1.50159900  
H 1.63205200 1.98541500 1.03882800  
O 3.96840400 0.21196000 0.79589000  
H 4.31561400 -0.65052800 0.50589600  
H 3.11450700 -0.00430100 1.19237400  
O -2.52563100 -1.64535300 1.94074900  
H -1.72911500 -1.44789300 1.41370900  
H -2.23258500 -2.10012800 2.73209800  
O 4.24468600 -2.38316800 -0.12872500  
H 4.57522500 -2.63173100 -0.99310500  
H 3.27799300 -2.35800400 -0.21086800  
O 2.91963200 1.52546400 -1.28263600  
H 3.44735500 1.07799200 -0.57574700  
H 2.62364100 2.35052700 -0.87629500  
O -3.59391200 0.91570900 1.41707600  
H -3.37754600 0.03586100 1.76342700  
H -3.92656200 0.75369500 0.51975900  
O -4.02241700 0.24381700 -1.30941600  
H -4.80028700 0.27712800 -1.86901100  
H -3.78395300 -0.70934100 -1.19439400  
O -3.13611800 -2.20689400 -0.81562400  
H -3.29520700 -2.37597600 0.12152000

H -2.18842600 -2.00770700 -0.83976500

**(H<sub>2</sub>SO<sub>4</sub>)(NH<sub>3</sub>)(H<sub>2</sub>O)<sub>9</sub> [4-5] Cluster (1.23 kcal/mol),  $\Delta\alpha = 17.22$ ,  $\bar{\alpha} = 133.09$**

S -1.09389800 -1.33721300 -0.03046500  
O -0.01948400 -2.32247300 -0.06513200  
O -2.33992100 -1.79017300 -0.60770900  
O -1.32537400 -1.14084900 1.51636000  
H -2.02263900 -0.45769500 1.63228200  
O -0.67901300 -0.04589300 -0.55422100  
H 1.48475700 1.11590000 -0.26008400  
N 1.64473200 1.23248300 -1.29514800  
H 0.88152100 1.79538500 -1.67882600  
H 1.64519300 0.29862100 -1.72217100  
H 2.56248600 1.68429000 -1.36524100  
O 1.50110000 1.21433800 1.41908000  
H 0.63001000 1.63044900 1.57222300  
H 1.46136000 0.30461200 1.75075000  
O -0.86242800 2.61649000 1.34343600  
H -1.66058100 2.09594700 1.50222000  
H -0.88415700 2.78001900 0.39051000  
O -1.02104600 2.39293700 -1.55606200  
H -1.75395100 2.74008100 -2.06718900  
H -1.26769500 1.47999100 -1.32230000  
O 1.80679900 -1.59650700 -1.97115400  
H 1.13197300 -1.94606200 -1.35429800  
H 1.77062400 -2.14745700 -2.75477700  
O -3.55863600 0.53975300 -1.28098800  
H -4.40889200 0.44684000 -1.71447800  
H -3.17910600 -0.36304300 -1.22297000  
O -3.16079400 0.86899600 1.38701700  
H -3.96471000 0.92163900 1.90727700  
H -3.42989600 0.83253800 0.44330700  
O 3.77817900 -0.81123200 -0.05252000  
H 3.33550800 -1.24015500 -0.79547800  
H 3.28943000 -1.11207100 0.72618300  
O 4.04415400 1.98555000 -0.05287300  
H 3.48423300 2.13698200 0.71707700  
H 4.18401200 1.02408900 -0.02910600  
O 1.81342300 -1.56970900 1.87259200  
H 1.13673200 -1.96956700 1.29604400  
H 1.74736200 -2.01312100 2.71990900

**(H<sub>2</sub>SO<sub>4</sub>)(NH<sub>3</sub>)(H<sub>2</sub>O)<sub>9</sub> [5-4] Cluster (0.00 kcal/mol),  $\Delta\alpha = 27.34$ ,  $\bar{\alpha} = 135.38$**

S -0.18975900 0.00436500 0.18796500  
O 1.12031500 0.45009600 0.69205800  
O -1.18410600 -0.03632200 1.27276600  
O -0.63671800 0.96549200 -0.85286400  
H -1.93612800 0.62705400 -1.44924700  
O -0.05135800 -1.34737800 -0.40777900  
H 1.55361300 -1.71891400 -0.62775800  
N 2.59394200 -1.87102300 -0.63378000  
H 2.83060200 -2.73226400 -1.11329100  
H 2.89895700 -1.90595600 0.34381700

H 3.08233600 -1.02998500 -1.09617500  
O -2.86162800 0.29393600 -1.78547300  
H -3.55677100 0.58353000 -1.06783400  
H -2.79654600 -0.72316900 -1.72065200  
O -3.44208600 -1.47460200 1.24373300  
H -3.60921800 -1.92891900 2.07114900  
H -2.57412200 -1.01983700 1.33769500  
O 2.00809600 2.19842300 -1.33794600  
H 1.19303900 2.14317600 -1.84588900  
H 1.74464200 1.79874200 -0.49378400  
O -2.51604100 -2.19227500 -1.32092800  
H -2.99009700 -2.28548400 -0.48033800  
H -1.58262400 -2.09598100 -1.05073300  
O -2.52426600 2.40911200 1.31262000  
H -1.96061900 1.62337000 1.42978200  
H -2.03394400 2.96178800 0.69922000  
O -4.41907600 0.90924200 0.08425000  
H -3.88431700 1.57022100 0.57625500  
H -4.38006400 0.10472100 0.62584300  
O 2.98411200 -0.83842700 2.00738100  
H 2.20591100 -0.33020700 1.67260400  
H 2.82167000 -1.03018300 2.93218100  
O 5.18833200 0.40793700 0.81335600  
H 5.44508000 1.25100900 1.19019500  
H 4.48279500 0.05904100 1.38257800  
O 3.86158000 0.21786500 -1.63408200  
H 3.24281300 0.97573600 -1.68412700  
H 4.46430100 0.42502000 -0.89921300

**(H<sub>2</sub>SO<sub>4</sub>)(NH<sub>3</sub>)(H<sub>2</sub>O)<sub>9</sub> [6-3] Cluster (4.14 kcal/mol),  $\Delta\alpha = 23.19$ ,  $\bar{\alpha} = 135.35$**

S 0.46240800 0.11668200 -0.11713900  
O 1.66302700 0.02759900 -0.93377800  
O -0.78136900 0.05620400 -0.84683100  
O 0.52436100 -1.14990700 0.79294600  
H -0.42078600 -1.43921500 1.12599000  
O 0.53185200 1.28588300 0.76835200  
H 2.29276100 1.70600300 0.91071500  
N 3.30779800 1.50833100 0.96997800  
H 3.38037800 0.53189000 1.35962900  
H 3.78594800 2.18192500 1.55728100  
H 3.70762300 1.48754600 0.00495900  
O -1.75051900 -1.86957600 1.51503100  
H -1.83391600 -2.29600100 2.37015500  
H -2.44422500 -1.10483300 1.48062900  
O -2.46242300 -2.23291300 -1.32117400  
H -2.37649600 -2.53356400 -0.41002300  
H -1.80619100 -1.52552900 -1.37533700  
O -1.99977300 2.39904900 1.12553300  
H -1.08389400 2.08426800 1.01860300  
H -1.98770800 3.04935400 1.82935600  
O -4.58496100 -0.35369300 -0.99473500  
H -4.01722100 -1.08548400 -1.28586600  
H -4.18416300 0.44119500 -1.38394100

O -3.44606600 -0.02546900 1.39211900  
H -3.01410300 0.84075200 1.32736600  
H -3.95893000 -0.13904800 0.55118700  
O -2.91097200 1.85228900 -1.57967100  
H -2.85374700 2.34802800 -0.75479000  
H -2.11811100 1.30130000 -1.54642700  
O 3.76854900 -1.64354100 -1.00983200  
H 3.76200500 -2.46680700 -1.50174000  
H 2.87459200 -1.25649900 -1.08407700  
O 3.25964700 -1.10672000 1.70977700  
H 2.31028800 -1.28825000 1.64783300  
H 3.62589200 -1.52828100 0.91657700  
O 4.19586400 1.13262900 -1.63048900  
H 4.45115200 0.19977700 -1.58916300  
H 3.29800900 1.09158700 -1.98250800

**(H<sub>2</sub>SO<sub>4</sub>)(NH<sub>3</sub>)(H<sub>2</sub>O)<sub>9</sub> [7-2] Cluster (4.12 kcal/mol),  $\Delta\alpha = 24.62$ ,  $\bar{\alpha} = 134.92$**

S 0.69116500 0.02602500 -0.15345500  
O 1.58429600 -0.72032200 -1.05552100  
O -0.70284300 -0.03312700 -0.65574400  
O 0.74611800 -0.52333400 1.20773500  
H -0.72845700 -1.06136700 1.81575300  
O 1.11879500 1.45969100 -0.12824900  
H 2.55606900 1.53996100 -0.69981600  
N 3.48843000 1.28918900 -1.17690300  
H 3.86247400 2.04667700 -1.73592700  
H 3.23010100 0.48950400 -1.75767200  
H 4.17919100 0.96173700 -0.45990900  
O -1.65968900 -1.20988300 2.10344300  
H -2.07415300 -1.71756800 1.38506900  
H -2.21699600 0.08868700 2.00646100  
O -1.02599100 -2.37987500 -2.00983200  
H -0.21354200 -2.88453600 -1.93044800  
H -0.78280100 -1.48694600 -1.69943700  
O -2.69220300 1.01848800 1.81523200  
H -3.27445600 0.81991700 1.00039100  
H -2.00684500 1.71210200 1.51558900  
O -2.10412700 1.97042700 -1.63846100  
H -1.94988500 2.19689800 -2.55658600  
H -1.46566100 1.25666100 -1.40010400  
O -3.96354600 0.36269600 -0.29598000  
H -3.66011200 -0.55541000 -0.40664500  
H -3.50945100 0.88616000 -0.97604000  
O -1.09663400 2.78968700 0.88300700  
H -1.48995300 2.90662700 0.00541600  
H -0.21799400 2.41529300 0.68246400  
O -2.96925900 -2.28095000 -0.17185800  
H -2.27637800 -2.46146700 -0.84866000  
H -3.57852400 -3.02109300 -0.19045000  
O 3.25376000 -1.78718900 0.95157700  
H 2.53624400 -1.46366600 1.51520900  
H 2.82007800 -1.73208500 0.08529300  
O 5.11054900 0.07276800 0.62499300

H 4.48944400 -0.66512600 0.85483500  
H 5.50014100 0.37570300 1.44609000

**(H<sub>2</sub>SO<sub>4</sub>)(NH<sub>3</sub>)(H<sub>2</sub>O)<sub>9</sub> [8-1] Cluster (10.09 kcal/mol),  $\Delta\alpha = 25.40$ ,  $\bar{\alpha} = 135.23$**

S 1.25034500 -0.61265500 -0.74077200  
O 2.27854700 -1.55523100 -1.13003000  
O 0.13358600 -0.52235300 -1.66784800  
O 0.71474700 -1.01402100 0.62786000  
H 0.30931200 0.15266400 1.40295700  
O 1.85956700 0.74685000 -0.54345600  
H 3.29024900 0.45048600 -0.15523000  
N 4.22035800 -0.06914100 0.08663700  
H 4.95369500 0.53889300 0.43094800  
H 4.49678100 -0.54481300 -0.76868100  
H 3.95264200 -0.80581900 0.78046100  
O -0.07057300 0.95102200 1.95260800  
H -1.08481400 1.01865100 1.73080300  
H 0.34208500 1.82999900 1.64605300  
O -3.78054900 -1.14743700 -1.33788200  
H -2.98153200 -1.53996900 -0.90805000  
H -4.06954700 -1.77166700 -2.00542900  
O 0.77069600 3.20804300 1.11498800  
H 0.30531100 3.96442600 1.47691600  
H 0.55216500 3.17381100 0.14576500  
O -1.99185000 1.04655600 -1.39913200  
H -2.75320200 0.54435100 -1.71836500  
H -1.22974200 0.42767700 -1.49565200  
O -2.43626300 1.21552800 1.23162400  
H -3.11924900 0.55466000 1.43199200  
H -2.32571600 1.19510900 0.24954800  
O 0.25018700 2.83962200 -1.44449600  
H -0.63269400 2.49430800 -1.63272700  
H 0.82958100 2.05951600 -1.45254600  
O -1.89223900 -2.05352700 0.26613900  
H -2.30101600 -1.87380800 1.11791100  
H -0.96955800 -1.75108900 0.32378100  
O -4.30219700 -0.86244600 1.36273600  
H -5.17401200 -0.84295300 1.75972700  
H -4.42599300 -0.98411300 0.40467700  
O 3.10229800 -2.03026000 1.69565900  
H 2.19366100 -1.74874900 1.47292800  
H 3.20593300 -2.83384500 1.17795300

**(H<sub>2</sub>SO<sub>4</sub>)(NH<sub>3</sub>)(H<sub>2</sub>O)<sub>9</sub> [9-0] Cluster (7.58 kcal/mol),  $\Delta\alpha = 22.12$ ,  $\bar{\alpha} = 136.76$**

S -2.54019800 0.18769300 0.00041800  
O -3.95983300 0.18400000 -0.14122100  
O -1.76310900 1.12529500 -0.75728200  
O -2.19292000 0.30659000 1.47198300  
H -1.20652600 0.72861100 1.65024700  
O -2.00839100 -1.21780200 -0.41879000  
H -2.74139100 -1.93253900 -0.24776700  
N -4.03985000 -2.77864700 0.02398100  
H -4.31333600 -3.44999200 -0.68255500

H -4.71459400 -2.01794300 0.02384400  
H -4.08073000 -3.23600000 0.92653600  
O -0.01055900 1.31355000 1.87018500  
H 0.67600200 0.77369600 2.30631000  
H 0.39134800 1.62448000 1.02494200  
O -0.66775200 3.47977900 -1.73240000  
H -0.99107200 4.29562900 -1.34713400  
H -1.30284700 2.79456000 -1.47656500  
O 0.77421200 -0.77898000 -0.99421800  
H -0.16073200 -1.00419600 -1.08233400  
H 1.26496600 -1.11971400 -1.76569100  
O 1.20323800 1.89837100 -0.45644700  
H 0.69614200 2.56610200 -0.95326500  
H 0.97027600 1.03011700 -0.83447600  
O 2.31341000 -2.01016900 0.97713600  
H 1.67590500 -1.66326400 0.32611800  
H 3.16949700 -1.91840500 0.53499000  
O 2.72396400 -1.58407600 -2.70029700  
H 3.42245800 -1.37226700 -2.05405200  
H 2.87236900 -2.49318200 -2.96416500  
O 2.16187300 -0.10419100 2.77451200  
H 2.33129800 -0.37850600 3.67678700  
H 2.22866200 -0.90876300 2.19486900  
O 4.43283300 -0.96525400 -0.60282600  
H 5.38902400 -0.95560200 -0.66740600  
H 4.16939400 -0.11220200 -0.16204800  
O 3.62224200 1.18675400 0.66768500  
H 2.87750100 1.61368300 0.20990800  
H 3.26484000 0.91221500 1.52418200

**(H<sub>2</sub>SO<sub>4</sub>)(NH<sub>3</sub>)(H<sub>2</sub>O)<sub>10</sub> [0-10] Cluster (5.01 kcal/mol),  $\Delta\alpha = 13.07$ ,  $\bar{\alpha} = 144.75$**

S 2.71094400 -0.37409500 -0.26658000  
O 1.40986300 -0.74839000 -0.81093000  
O 3.82619300 -1.13744500 -0.71849300  
O 2.89053200 1.10333600 -0.90273700  
H 3.83154500 1.30623700 -0.95078100  
O 2.64478900 -0.15361100 1.16937800  
H -0.16240600 -1.23793600 2.00242900  
N -0.58736900 -1.30173700 1.06527500  
H -1.34498100 -0.60737900 0.94217600  
H -0.94516700 -2.24117400 0.87217700  
H 0.15520200 -1.06677900 0.37975700  
O 0.20300200 2.15784000 -1.24629700  
H 1.11308300 1.87698700 -1.40298700  
H -0.37008900 1.52960700 -1.72176400  
O 0.22260600 1.39031800 1.48383600  
H 0.19163300 1.67371800 0.55433000  
H 1.12011900 1.05230700 1.60286000  
O -2.71933500 0.39581800 0.27364700  
H -2.66022500 1.25838700 0.75808000  
H -2.47177600 0.56287400 -0.65095800  
O -1.66051300 0.42442100 -2.30608200  
H -2.10391300 0.60398000 -3.13682500

H -1.31769300 -0.50580200 -2.34752400  
O 1.22393800 -1.35925000 3.21331900  
H 1.32890900 -0.87225900 4.03191900  
H 1.91660700 -1.03320100 2.61442700  
O -0.63605600 -1.99648700 -2.24037500  
H 0.25604700 -1.82752000 -1.90549300  
H -1.06044700 -2.62162000 -1.63387600  
O -2.26578900 2.62855400 1.63344700  
H -1.39577200 2.34442200 1.94907300  
H -2.06402300 3.34582700 1.00864200  
O -1.98867200 -3.47228100 -0.21622500  
H -2.85550600 -3.04181400 -0.04713000  
H -2.13475100 -4.41921800 -0.23358800  
O -1.32701800 4.31585600 -0.39375400  
H -0.67629800 3.69943500 -0.76847700  
H -0.86255300 5.14007600 -0.24309500  
O -4.09551200 -1.90661000 0.29585800  
H -4.82274000 -1.96824400 0.91571000  
H -3.75254100 -0.98978600 0.34254200

**(H<sub>2</sub>SO<sub>4</sub>)(NH<sub>3</sub>)(H<sub>2</sub>O)<sub>10</sub> [1-9] Cluster (6.72 kcal/mol),  $\Delta\alpha = 24.80$ ,  $\bar{\alpha} = 144.98$**

S 2.87697900 -0.04078500 -0.17803200  
O 1.97633200 -1.00670100 -0.79643900  
O 4.26815900 -0.21204500 -0.48102400  
O 2.41525900 1.32553000 -0.87185800  
H 3.02727700 2.02037200 -0.54172100  
O 2.59919300 0.12686300 1.24369800  
H 0.98430500 -0.56765700 1.63257800  
N 0.03341700 -0.90227500 1.38845500  
H -0.61268400 -0.95291500 2.19044700  
H 0.13971500 -1.82728500 0.95953000  
H -0.30863200 -0.21726500 0.69344400  
O -0.41808400 1.23745000 -0.41514200  
H -0.84814900 2.09936400 -0.22539400  
H 0.48263000 1.40741000 -0.72651200  
O -1.96423200 3.37863100 -0.00198800  
H -1.92966000 4.07771800 0.65135500  
H -2.83449200 2.93670100 0.09967600  
O 4.48173800 2.50863900 0.46024700  
H 4.97068200 1.73116600 0.15610200  
H 4.18095000 2.25379100 1.33851700  
O 1.11304600 -3.35584100 0.17708400  
H 1.74425100 -2.68922600 -0.15055300  
H 1.62228200 -4.08818800 0.52725700  
O -2.11525400 -1.24481100 3.16817500  
H -2.82719100 -1.15192300 2.50932300  
H -2.42163700 -0.81834300 3.96927000  
O -3.71230500 -0.83157400 0.97956500  
H -3.14534200 -0.84666900 0.17611000  
H -4.57626300 -1.12566200 0.67760700  
O -4.22051500 1.92526100 0.26826400  
H -4.02715400 1.13194400 0.78511800  
H -4.59173200 1.55544200 -0.54660200

O -0.24708500 -2.24446100 -2.06008000  
H 0.52075900 -1.66077500 -1.97930500  
H -0.01666500 -2.98856800 -1.49073900  
O -2.23026700 -0.61544000 -1.26479100  
H -1.64708100 0.15733900 -1.14333800  
H -1.62725200 -1.31183100 -1.60520800  
O -4.86264000 0.01677500 -1.70845500  
H -3.92879500 -0.23019700 -1.82650700  
H -5.26246800 0.00753900 -2.57917100

**(H<sub>2</sub>SO<sub>4</sub>)(NH<sub>3</sub>)(H<sub>2</sub>O)<sub>10</sub> [2-8] Cluster (0.00 kcal/mol),  $\Delta\alpha = 28.03$ ,  $\bar{\alpha} = 143.07$**

S -1.98660500 -1.16780500 0.02356800  
O -0.95839300 -2.19746400 0.00939100  
O -3.28152100 -1.60974100 0.47321200  
O -1.43004900 -0.14435700 1.10178300  
H -2.10016300 0.56461300 1.24913400  
O -2.03726700 -0.42639900 -1.23636500  
H 0.29779100 -1.52441400 -1.16121200  
N 0.76916000 -0.79387300 -1.71629000  
H 0.24851000 -0.67150100 -2.57940500  
H 1.78087000 -0.99369400 -1.87902700  
H 0.71679200 0.08694600 -1.16570700  
O 0.86738500 1.70573800 -0.41837900  
H -0.03099500 2.06662900 -0.61114900  
H 0.94810700 1.61653200 0.54788100  
O -1.64316300 2.30937200 -1.06595700  
H -2.19926100 2.55780500 -0.31700600  
H -1.86706300 1.37264800 -1.21651100  
O -4.91480000 0.39031100 -0.49493800  
H -4.54954400 0.47766100 -1.38023900  
H -4.56016200 -0.46433500 -0.18697400  
O 3.97848900 -1.78446300 0.69842500  
H 4.37720800 -2.55450700 1.10576300  
H 3.02240200 -1.77937300 0.93827800  
O -3.35466300 1.77213500 1.14173500  
H -3.81271400 2.05364000 1.93557500  
H -4.02900600 1.33623800 0.55885000  
O 3.50423700 -0.90684800 -1.92294600  
H 3.67052900 0.04352000 -1.83717200  
H 3.83985700 -1.30733000 -1.10501400  
O 3.37752900 1.87821900 -1.33882700  
H 2.43446700 1.98071000 -1.08458600  
H 3.64583000 2.68703600 -1.77740900  
O 4.10949500 0.97984000 1.25603700  
H 4.05163800 1.35353700 0.36388600  
H 4.26713700 0.03054700 1.13479000  
O 1.42285200 -1.34861300 1.16680000  
H 1.25019800 -0.53209400 1.65916900  
H 0.56619700 -1.77856900 1.02296400  
O 1.64494500 1.22803200 2.18288700  
H 1.54266400 1.65519000 3.03382400  
H 2.60966200 1.19846700 1.96537800



**(H<sub>2</sub>SO<sub>4</sub>)(NH<sub>3</sub>)(H<sub>2</sub>O)<sub>10</sub> [3-7] Cluster (2.22 kcal/mol),  $\Delta\alpha = 29.53$ ,  $\bar{\alpha} = 144.24$**

S 1.36072000 0.54293100 -0.18105000  
O 0.01880000 1.08112400 -0.37161200  
O 1.81708100 -0.24199800 -1.31882000  
O 2.26466500 1.78923300 -0.05275000  
H 3.24440400 1.53531900 0.01558500  
O 1.44988400 -0.21049300 1.07064800  
H -0.23281700 -0.97361600 1.26379300  
N -1.14734400 -1.26394100 0.88498300  
H -0.99852200 -1.52711100 -0.10929600  
H -1.81573200 -0.47255300 0.92762600  
H -1.57020400 -2.03515000 1.40002900  
O -3.29045800 0.47424200 1.44467800  
H -3.79663100 -0.32209100 1.65994100  
H -3.78143300 0.96491400 0.76930900  
O -3.73627400 -2.29803600 1.59676700  
H -4.39693000 -2.91666100 1.91156300  
H -3.72648100 -2.35706300 0.61803600  
O 4.40889500 -1.35886900 -0.83957400  
H 4.27244000 -1.69789300 0.06126400  
H 3.51518400 -1.19662000 -1.17612900  
O -2.31302000 0.35148500 -1.68872500  
H -1.48096000 0.66193300 -1.29108200  
H -2.93600300 1.08678100 -1.58336800  
O 4.72522000 1.05972500 0.11322400  
H 5.36065700 1.61426700 -0.34352900  
H 4.73758300 0.16690200 -0.33015300  
O 3.88771400 -1.35607500 1.91285500  
H 3.01622600 -0.96485600 1.74274600  
H 4.45686000 -0.60079600 2.08426000  
O -0.47805400 -1.78422400 -1.83750800  
H 0.42730100 -1.42819300 -1.82413200  
H -0.97513900 -1.14197700 -2.35789600  
O -3.32642400 -2.11101800 -1.04994700  
H -2.72563300 -2.69578600 -1.51964600  
H -3.03862300 -1.20607500 -1.28831200  
O -1.69848200 2.86574100 0.93292800  
H -0.93592400 2.42415500 0.52527200  
H -1.96550000 2.27436500 1.64489200  
O -3.84172500 2.37815300 -0.56535100  
H -3.06686700 2.75566100 -0.08638200  
H -4.42994100 3.10091400 -0.78699300

**(H<sub>2</sub>SO<sub>4</sub>)(NH<sub>3</sub>)(H<sub>2</sub>O)<sub>10</sub> [4-6] Cluster (4.36 kcal/mol),  $\Delta\alpha = 29.45$ ,  $\bar{\alpha} = 144.37$**

S -0.97021400 0.44346000 0.57495900  
O 0.00631500 1.52346300 0.55001800  
O -2.23624400 0.82834400 1.17580200  
O -1.25296600 0.15457000 -0.93949100  
H -1.90565900 -0.66895400 -0.99515900  
O -0.44733600 -0.78860500 1.14673200  
H 1.20051500 -1.17303900 0.84510300  
N 2.21690800 -1.16804300 0.61529200  
H 2.79213100 -1.33611100 1.43802000

H 2.43043800 -0.22526500 0.27218800  
H 2.45282500 -1.82620700 -0.16198500  
O -2.79500000 -1.80069500 -0.92529500  
H -2.73110800 -2.13619100 -0.02003400  
H -3.73403800 -1.48920500 -0.97315300  
O -4.03968400 1.71084100 -0.81867600  
H -3.45579600 1.66150600 -1.57917600  
H -3.45025800 1.56841100 -0.06116700  
O 1.46519000 -0.08822100 -1.94326600  
H 0.51226700 -0.14181000 -1.78772100  
H 1.62537500 0.85523100 -2.07741600  
O -5.25373700 -0.80870700 -0.62217000  
H -5.03763400 0.13557300 -0.71373100  
H -5.19060900 -0.98870900 0.32469100  
O 2.73318300 1.74692000 0.84124300  
H 1.78003500 1.72982900 1.03228400  
H 2.78362900 2.25162700 0.01974200  
O -3.74713700 -1.44947300 1.75317200  
H -3.21358700 -0.63599600 1.72537500  
H -3.69785000 -1.76927400 2.65511300  
O 4.45060300 0.03984300 2.02359300  
H 3.93796200 0.81870700 1.73216500  
H 4.93324000 0.29345400 2.81159300  
O 3.05861000 -2.40484300 -1.68084600  
H 2.58819900 -1.70312600 -2.15493600  
H 3.94023300 -2.04282100 -1.51401200  
O 1.42180200 2.71030300 -1.47637400  
H 0.70513300 2.44023800 -0.87426000  
H 1.12095500 3.49629700 -1.93487900  
O 5.19096700 -0.96262300 -0.47671100  
H 6.05225400 -0.70219800 -0.80580400  
H 5.12988300 -0.61996400 0.42894400

**(H<sub>2</sub>SO<sub>4</sub>)(NH<sub>3</sub>)(H<sub>2</sub>O)<sub>10</sub> [5-5] Cluster (2.91 kcal/mol),  $\Delta\alpha = 32.60$ ,  $\bar{\alpha} = 144.31$**

S -0.18214500 -0.77396200 -0.28395000  
O 1.05803600 -1.54148000 -0.41747300  
O -1.31051200 -1.38570700 -0.94408200  
O -0.46145500 -0.81171100 1.26256200  
H -1.41915500 -0.49190200 1.44676400  
O 0.00904500 0.61972100 -0.65348700  
H 1.71649100 2.41208400 -0.57100500  
N 2.48550600 1.78286100 -0.36310600  
H 3.39615500 2.26036900 -0.28823400  
H 2.52675600 1.07235800 -1.10757400  
H 2.26994800 1.29768100 0.54607300  
O -2.85348300 0.02592000 1.52676800  
H -3.38790000 -0.70059800 1.16617100  
H -2.81774300 0.69154500 0.79689500  
O -3.84868300 -1.93885900 -0.20081600  
H -4.08590300 -2.86702000 -0.18041300  
H -2.93554500 -1.88311800 -0.54442900  
O 2.97103400 -1.93810700 1.47031100  
H 3.00741800 -2.79241300 1.90287200

H 2.22057600 -1.96145200 0.84414700  
O -2.62003500 1.71859500 -0.55510900  
H -3.26626200 1.27420700 -1.13716900  
H -1.73276300 1.46330600 -0.84684200  
O -5.06349300 2.09686400 0.96818200  
H -4.71993700 1.56288200 1.69075100  
H -4.27450700 2.49471200 0.58145400  
O -4.88869300 0.44953700 -1.40718800  
H -5.28048300 0.89379900 -0.64145200  
H -4.73861200 -0.46197200 -1.12327500  
O 2.78917100 -0.46549100 -2.16390600  
H 2.10346400 -0.96771500 -1.67587900  
H 2.61722000 -0.58880500 -3.09878800  
O 4.72977300 -0.38112200 -0.11505300  
H 4.30434600 -0.97928300 0.51605100  
H 4.31337200 -0.57634300 -0.96512400  
O 1.92189400 0.59932000 2.03117900  
H 2.42754100 -0.22186700 2.12238300  
H 1.00439200 0.29438500 1.99046400  
O 5.21013000 2.28605900 -0.14589700  
H 5.86431000 2.68961100 0.42486100  
H 5.26078200 1.32058200 -0.01170500

**(H<sub>2</sub>SO<sub>4</sub>)(NH<sub>3</sub>)(H<sub>2</sub>O)<sub>10</sub> [6-4] Cluster (1.09 kcal/mol),  $\Delta\alpha = 25.90$ ,  $\bar{\alpha} = 143.60$**

S 0.11932500 -0.17201800 -0.67130100  
O -0.96086700 0.62845500 -1.25300800  
O 1.41258400 0.12069500 -1.28416900  
O 0.20599100 0.20047800 0.80478200  
H 1.38514000 -0.45888700 1.41455400  
O -0.20177200 -1.60459500 -0.75467600  
H -2.08592900 -1.67267900 -0.99335300  
N -3.00949500 -1.31240500 -0.70946000  
H -3.68082800 -2.05247100 -0.52027200  
H -3.35160900 -0.61021200 -1.39008700  
H -2.84640500 -0.81319800 0.18681900  
O 2.22705200 -0.97923700 1.71699900  
H 3.01630300 -0.40825300 1.47754500  
H 2.23193500 -1.84408300 1.08485300  
O 0.21365100 2.92667600 1.25320000  
H 0.29646000 3.10847600 2.19147800  
H 0.16792700 1.95401800 1.16939200  
O 2.15407200 -2.85289800 0.11440600  
H 1.29490900 -2.66307000 -0.30776200  
H 2.82989600 -2.53139100 -0.52252100  
O 2.63095200 2.36435300 -0.23730400  
H 1.93756000 2.80055600 0.27878100  
H 2.15326800 1.71589600 -0.78630800  
O 4.13268200 0.56936600 0.87966500  
H 4.86193400 0.91552400 1.39660100  
H 3.62429600 1.34687000 0.50330400  
O 3.80878300 -1.32640800 -1.38750200  
H 4.27579200 -0.76512000 -0.75733900  
H 3.02160000 -0.80451200 -1.61098400

O -2.49173100 2.32993800 0.17444900  
H -1.84780300 1.80135200 -0.33984000  
H -1.95857900 3.04707600 0.53409800  
O -2.45570900 0.03087100 1.71800800  
H -2.64164500 0.93439100 1.40222700  
H -1.48995700 -0.04101100 1.62891100  
O -3.56109100 0.98602400 -2.24607400  
H -3.70675700 1.67817000 -1.58908900  
H -2.61229900 1.04574000 -2.42024100  
O -4.27160100 -2.11840900 1.65744000  
H -4.72876300 -2.53613200 2.38796800  
H -3.73315800 -1.41040800 2.03855000

**(H<sub>2</sub>SO<sub>4</sub>)(NH<sub>3</sub>)(H<sub>2</sub>O)<sub>10</sub> [7-3] Cluster (4.86 kcal/mol),  $\Delta\alpha = 29.13$ ,  $\bar{\alpha} = 145.74$**

S 0.42784700 -0.12354700 -0.41105800  
O 1.57775600 -0.40557200 -1.25823000  
O -0.83617600 -0.07659900 -1.12023300  
O 0.36754000 -1.29087700 0.59410100  
H -0.59726500 -1.41020400 1.05581900  
O 0.65227600 1.11148800 0.36411700  
H 2.26275400 1.53517700 0.22883300  
N 3.26268100 1.44275600 -0.08036600  
H 3.78805100 2.30957000 -0.13150300  
H 3.21553800 1.01014800 -1.00454000  
H 3.77043800 0.77967700 0.52930400  
O -1.80145500 -1.64093400 1.66478600  
H -2.31180200 -0.83177100 1.86758000  
H -2.37798000 -2.23174000 1.12688600  
O -2.97336900 -1.68479700 -2.14777800  
H -3.50126300 -0.90885700 -1.91326100  
H -2.06799400 -1.36378200 -2.03321900  
O -1.53107200 2.58974500 1.32578600  
H -0.74948100 2.14198200 0.96452900  
H -1.94241000 3.06948800 0.58608700  
O -3.44377700 0.80306500 -0.76940100  
H -2.49148400 0.60077000 -0.77574200  
H -3.70439100 0.67797300 0.15456400  
O -3.17130400 0.69297500 2.04501300  
H -3.63525700 0.88722100 2.86050900  
H -2.55644500 1.45741200 1.86032200  
O -3.06691000 3.54198400 -0.79295000  
H -3.33240500 2.61784800 -0.95356200  
H -2.80143200 3.89712400 -1.64197600  
O -3.33523200 -3.14921500 0.07775900  
H -3.23533700 -2.71651400 -0.79992800  
H -3.18021000 -4.08509400 -0.05519300  
O 3.00742400 -2.36016300 0.11088400  
H 2.26041000 -2.48652500 0.70666900  
H 2.59633500 -1.83257900 -0.59631900  
O 4.77111000 -0.65815800 1.05286800  
H 4.16238800 -1.38636200 0.75215300  
H 5.06116900 -0.88005400 1.93893000  
O 5.91707000 1.20890300 -0.68207400

H 5.85770600 0.39643200 -0.15970300  
H 6.75501500 1.17534600 -1.14492200

**(H<sub>2</sub>SO<sub>4</sub>)(NH<sub>3</sub>)(H<sub>2</sub>O)<sub>10</sub> [8-2] Cluster (6.48 kcal/mol),  $\Delta\alpha = 34.01$ ,  $\bar{\alpha} = 144.67$**

S 1.43358600 -0.15538100 -0.72677900  
O 2.71335600 -0.74881900 -1.04079400  
O 0.36697600 -0.44627600 -1.65077900  
O 1.05038100 -0.80968400 0.65051200  
H 0.08073300 -0.58668700 0.89219300  
O 1.56550300 1.28829200 -0.46329000  
H 3.00669700 1.57281500 0.22423100  
N 3.92289200 1.51548800 0.75559100  
H 4.13065700 2.37999100 1.24213500  
H 4.67809000 1.25169200 0.11753900  
H 3.82207400 0.70009900 1.41367700  
O -1.38541600 -0.26571300 1.13743200  
H -1.84329100 -1.09241300 1.39357200  
H -1.75376000 -0.00389800 0.26652900  
O -1.80098900 -2.23530300 -1.25509800  
H -1.71372800 -2.74503300 -0.44246700  
H -0.93859500 -1.82338600 -1.40778800  
O -0.77022800 2.92429700 -0.54420400  
H 0.09098200 2.49482500 -0.44040400  
H -1.19360700 2.92666500 0.33221600  
O -2.21689300 0.85184300 -1.27481200  
H -1.74113300 0.29284600 -1.89740700  
H -1.65079500 1.65828300 -1.14398800  
O -4.31866000 -1.48843200 -0.23261800  
H -4.54675100 -0.55802800 -0.09742800  
H -3.58437600 -1.50273700 -0.86624500  
O -2.38220500 2.38548600 1.69291600  
H -3.23839400 2.22563000 1.27283500  
H -2.03695500 1.49761600 1.85246900  
O -2.69011000 -2.63268500 1.49819100  
H -3.01314000 -3.08719100 2.27677100  
H -3.47045400 -2.30213000 0.99362300  
O -4.52803400 1.37908400 -0.05132600  
H -5.23759300 1.86925800 -0.47041800  
H -3.81266600 1.28875900 -0.71012900  
O 3.61356300 -0.88108100 1.98016600  
H 2.72598600 -1.11381800 1.66846200  
H 4.22071000 -1.32078200 1.37194200  
O 5.30988900 -0.61447100 -0.40941500  
H 4.43957100 -0.77186600 -0.82231800  
H 5.96507200 -1.02513500 -0.97532300

**(H<sub>2</sub>SO<sub>4</sub>)(NH<sub>3</sub>)(H<sub>2</sub>O)<sub>10</sub> [9-1] Cluster (7.48 kcal/mol),  $\Delta\alpha = 35.33$ ,  $\bar{\alpha} = 144.63$**

S -2.01471400 -0.33052000 -0.58635000  
O -3.15415400 -0.27369400 -1.48115900  
O -0.84057600 -0.97343500 -1.13988900  
O -1.66466800 1.14453700 -0.28298000  
H -0.95710000 1.25427500 0.50719500  
O -2.40254300 -0.94770800 0.70572100

H -3.92123100 -0.89886100 0.77652800  
 N -4.97790600 -0.72294600 0.59752600  
 H -5.56507400 -0.96973900 1.38592500  
 H -5.23011700 -1.26247700 -0.22682500  
 H -5.04981100 0.29009100 0.34814900  
 O -0.05169300 1.41320800 1.56099300  
 H 0.13583000 0.50492500 1.92482000  
 H 0.77716600 1.82999900 1.28408700  
 O 1.95040900 2.86745800 0.16645300  
 H 2.90400200 2.67354300 0.24757100  
 H 1.85515600 3.81945900 0.11499000  
 O -0.01287000 -1.08901600 2.32551500  
 H -0.89232400 -1.26825100 1.96665700  
 H 0.57431000 -1.62785900 1.76519200  
 O 1.49372600 0.46034200 -1.18507500  
 H 1.33364800 1.39590400 -1.00465100  
 H 0.62903500 0.02947000 -1.30529100  
 O 2.80271900 -0.13693200 1.21043400  
 H 3.16358100 -1.03178200 1.15982100  
 H 2.21576500 -0.07919400 0.43288400  
 O 1.08592300 -2.60171600 0.28882400  
 H 1.97007800 -2.58484800 -0.10405000  
 H 0.47322200 -2.21989600 -0.35297000  
 O 4.43152300 1.74779800 0.40902700  
 H 5.13044200 2.00551300 1.01196600  
 H 3.93573500 0.99726700 0.83247300  
 O 3.83686500 -2.31509200 -0.29619300  
 H 4.38755700 -3.06275500 -0.53136400  
 H 4.06684400 -1.57870600 -0.90720700  
 O 4.16906800 -0.11584800 -1.80995000  
 H 4.53579000 0.57781200 -1.24641700  
 H 3.22315400 0.09724200 -1.85496300  
 O -4.69377000 1.78770000 -0.46251800  
 H -4.10326800 2.39772200 -0.01234300  
 H -4.11129600 1.31926900 -1.08689000

**(H<sub>2</sub>SO<sub>4</sub>)(NH<sub>3</sub>)(H<sub>2</sub>O)<sub>10</sub> [10-0] Cluster (3.22 kcal/mol),  $\Delta\alpha = 31.96$ ,  $\bar{\alpha} = 145.53$**

S -2.18478300 -0.03308400 -0.13378200  
 O -3.19104200 0.66270500 -0.89974500  
 O -0.91180000 -0.21670500 -0.82103500  
 O -1.96744500 0.60507800 1.17821400  
 H -0.73153900 0.19634600 1.87270200  
 O -2.69404900 -1.47302400 0.14064500  
 H -3.72057900 -1.48985200 0.11362300  
 N -5.30031800 -1.26594800 -0.08905800  
 H -5.78375400 -1.92468400 -0.68639700  
 H -5.24088600 -0.37522000 -0.57524900  
 H -5.85426800 -1.13413800 0.74791100  
 O 0.17466900 -0.02864000 2.31520600  
 H 0.86328100 0.72712500 2.03547300  
 H 0.50191000 -0.91580400 1.98225100  
 O -1.94250200 3.23022800 -0.33685400  
 H -2.52499600 2.66741100 -0.86375100

H -1.99518800 2.81453800 0.53166900  
O 1.14518200 -2.27123200 1.42309500  
H 0.88838100 -3.08055900 1.86985600  
H 0.93590400 -2.39275500 0.43949600  
O 0.55234600 2.12546400 -0.84062100  
H -0.19092200 2.75502400 -0.79794400  
H 0.09993800 1.26452000 -0.92066900  
O 1.67303600 1.78367300 1.57689500  
H 2.61737000 1.57603500 1.44988300  
H 1.31100800 2.01899700 0.69147500  
O 0.68616600 -2.43620200 -1.08951600  
H 1.45502800 -2.09083500 -1.57385400  
H -0.00688500 -1.76079000 -1.18284800  
O 4.21180100 1.01639500 0.88501600  
H 4.14063900 0.02780400 0.83971400  
H 5.05608100 1.23378900 1.28224300  
O 3.03241500 -1.30414800 -2.10673700  
H 3.02434000 -0.31393000 -2.04777600  
H 3.46219800 -1.53493200 -2.93155200  
O 3.09246800 1.30650000 -1.71394000  
H 3.58202200 1.40761100 -0.88449200  
H 2.24298100 1.75544600 -1.58088800  
O 3.80076700 -1.56368400 0.57902700  
H 3.63732000 -1.65262900 -0.37429600  
H 2.99327500 -1.87879500 1.01013100
